# Optimal anticipatory control of movement as a theory of motor preparation: a thalamo-cortical circuit model

Ta-Chu Kao<sup>1</sup>, Mahdieh S. Sadabadi<sup>1,2</sup>, and Guillaume Hennequin<sup>®1</sup>

<sup>1</sup>Computational and Biological Learning Lab, Department of Engineering, University of Cambridge, Cambridge, U.K.

<sup>2</sup>Department of Automatic Control and Systems Engineering, University of Sheffield, Sheffield, U.K.

® Corresponding author (g.hennequin@eng.cam.ac.uk)

## Summary

Across a range of motor and cognitive tasks, cortical activity can be accurately described by low-dimensional dynamics unfolding from specific initial conditions on every trial. These “preparatory states” largely determine the subsequent evolution of both neural activity and behaviour, and their importance raises questions regarding how they are — or ought to be — set. Here, we formulate motor preparation as optimal prospective control of future movements. The solution is a form of internal control of cortical circuit dynamics, which can be implemented as a thalamo-cortical loop gated by the basal ganglia. Critically, optimal control predicts selective quenching of variability in components of preparatory population activity that have future motor consequences, but not in others. This is consistent with recent perturbation experiments performed in mice, and with our novel analysis of monkey motor cortex activity during reaching. Together, these results suggest optimal anticipatory control of movement.

Fast ballistic movements (e.g. throwing) require spatially and temporally precise commands to the musculature. Many of these signals are thought to arise from internal dynamics in the primary motor cortex (M1; [Figure 1A](#); [Evarts, 1968](#); [Todorov, 2000](#); [Scott, 2012](#); [Shenoy et al., 2013](#); [Omran et al., 2017](#)). In turn, consistent with state trajectories produced by a dynamical system, M1 activity during movement depends strongly on the “initial condition” reached just before movement onset, and variability in initial condition predicts behavioural variability ([Churchland et al., 2006a](#); [Afshar et al., 2011](#); [Pandarinath et al., 2018](#)). An immediate consequence of this dynamical systems view is the so-called “optimal subspace hypothesis” ([Churchland et al., 2010b](#); [Shenoy et al., 2013](#)): the network dynamics that generate movement must be seeded with an appropriate initial condition prior to each movement. In other words, accurate movement production likely requires fine adjustment of M1 activity during a phase of movement preparation ([Figure 1B](#), green).

The optimal subspace hypothesis helps to make sense of neural activity during the preparation epoch, yet several unknowns remain. What should the structure of the optimal preparatory subspace be? How does this structure depend on the dynamics of the cortical network during the movement epoch, and on downstream motor processes? Must preparatory activity converge to a single movement-specific state and be held there until movement initiation, or is some slack allowed? What are the dynamical processes and associated circuit mechanisms responsible for motor preparation? These questions

can be (and have been partially) addressed empirically, e.g. through analyses of neural population recordings in reaching monkeys ([Churchland et al., 2010b](#); [Ames et al., 2014](#); [Elsayed et al., 2016](#)) or optogenetic dissection of circuits involved in motor preparation ([Li et al., 2016](#); [Guo et al., 2017](#); [Gao et al., 2018](#); [Sauerbrei et al., 2019](#)). Yet, for lack of an appropriate theoretical scaffold, it has been difficult to interpret these experimental results within the broader computational context of motor control.

Here, we bridge this gap by considering motor preparation as an integral part of motor control. We show that optimal control theory, which has successfully explained behaviour ([Todorov and Jordan, 2002](#); [Scott et al., 2015](#)) and neural activity ([Todorov, 2000](#); [Lillicrap and Scott, 2013](#)) during the movement epoch, can also be brought to bear on motor preparation. Specifically, we argue that there is a prospective component of motor control that can be performed in anticipation of the movement (i.e. during preparation). This leads to a concrete normative formulation of the optimal subspace hypothesis. Our theory specifies the inputs that must be given to the movement-generating network during preparation to ensure that (i) any subsequent motor errors are kept minimal and (ii) movements can be triggered rapidly.

We provide a full circuit implementation of the optimal anticipatory control strategy, for a specific model of M1 that we have proposed previously ([Hennequin et al., 2014](#) — though the framework is general). In particular, we propose that cortex is actively controlled via a tha-

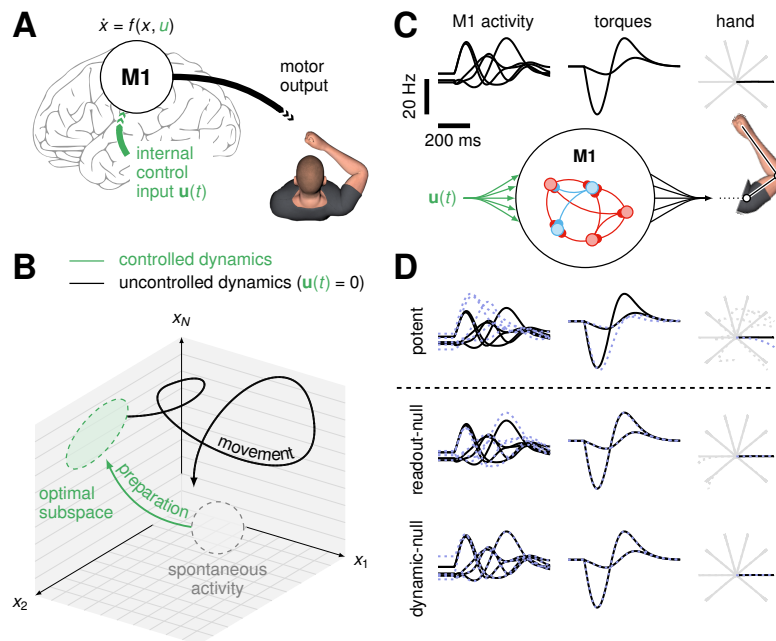

**Figure 1: Preparation & execution of ballistic movements.** (A) Under a dynamical systems view of motor control (Shenoy et al., 2013), movement is generated by internal dynamics in M1. Prior to movement, the population activity state  $\mathbf{x}(t)$  must be controlled into an optimal, movement-specific subspace in a phase of movement preparation; this requires internally generated control inputs  $\mathbf{u}(t)$ . (B) Schematic state space trajectory during movement preparation and execution. (C) Schematics of our M1 model of motor pattern generation. The dynamics of an excitation-inhibition network (Hennequin et al., 2014) unfold from movement-specific initial conditions, resulting in firing rate trajectories (left; 5 neurons shown) which are linearly read out into joint torques (middle), thereby producing hand movements (right). The model is calibrated for the production of eight straight center-out reaches; firing rates and torques are shown only for the movement colored black. To help visualize initial conditions, firing rates are artificially clamped for the first 100 ms. (D) Effect of three qualitatively different types of small perturbations of the initial condition on the three processing stages leading to movement, as already shown in (C). Unperturbed traces are shown as solid lines, perturbed ones as dashed lines. Perturbations of all types on the initial condition have the exact same size, but different consequences. “Potent” perturbations (top) result in errors at every stage. “Readout-null” perturbations (middle) cause sizeable changes in internal network activity but not in the readout. “Dynamic-null” perturbations are inconsequential at every stage.

62 lamocortical loop during motor preparation, with thalamic afferents providing the desired optimal control inputs. This is consistent with the causal role of thalamus in the preparation of directed licking in mice (Guo et al., 2017). Moreover, we posit that the basal ganglia operate an ON/OFF switch on the thalamocortical loop (Jin and Costa, 2010; Cui et al., 2013; Halassa and Acsády, 2016; Loggiaco et al., 2019), thereby flexibly controlling the timing of both movement planning and initiation.

71 We further analyze the model, and formulate predictions which we have successfully tested in data. At the most abstract level, our core prediction is that the “optimal subspace” is likely high dimensional, with many different initial conditions giving rise to the same correct movement. This has an important consequence for preparatory control: at the population level, only a few components of preparatory activity impact future motor outputs, and it is these components only that need active controlling. In contrast, one expects substantial pre-movement variability in other, inconsequential components. Concretely, we predict that following a perturbation, preparatory activity should recover only in state space directions that matter for subsequent movement,

85 but not (necessarily) in others. We find that this prediction agrees with the effects of optogenetic perturbations reported by Svoboda and colleagues, in a directed licking task in mice (Li et al., 2016). Furthermore, the existence of a preparatory nullspace predicts selective variability quenching at preparation onset: trial-by-trial variability should drop predominantly in components that have motor consequences. We perform novel analyses of monkey M1 and dorsal premotor cortex (PMd) activity recorded during reaching, and find that the structure of variability quenching supports our main prediction. Finally, our model also predicts that population activity should evolve in orthogonal subspaces during preparation and movement, which is one of the most prominent features of perimovement activity in reaching monkeys (Kaufman et al., 2014; Elsayed et al., 2016).

101 Beyond motor control, there is a broader set of cortical computations that are also thought to rest on low dimensional circuit dynamics, with initial conditions largely determining behaviour (Pandarinath et al., 2018; Sohn et al., 2019). These computations, too, may hinge on careful preparation of the state of cortex in appropriate subspaces. Our framework, and control theory more

generally, may provide a useful language for reasoning about putative algorithms and neural mechanisms (Kao and Hennequin, 2019).

## Results

### A model of movement generation

We begin with a network model of motor cortex in which a detailed balance of excitation and inhibition enables the production of rich, naturalistic activity transients (Hennequin et al., 2014, Figure 1C). This network serves as a pattern generator for the production of movement. Specifically, the network directly controls the two joint torques of a two-link arm (Section S2.2), via a linear readout of the momentary network firing rates:

$$\mathbf{m}(t) = \mathbf{C}\mathbf{r}(t). \quad (1)$$

Here,  $\mathbf{m}(t)$  is a vector containing the momentary torques, and  $\mathbf{r}(t)$  is the population firing rate vector (described below). We assume that the output torques are artificially silenced during movement preparation. The network has  $N = 200$  neurons, whose momentary internal activations  $\mathbf{x}(t) = (x_1, x_2, \dots, x_N)^T$  evolve according to (Dayan and Abbott, 2001; Section S2.1):

$$\begin{aligned} \tau \frac{d\mathbf{x}}{dt} &= -\mathbf{x}(t) + \mathbf{W}\mathbf{r}(t) + \bar{\mathbf{h}} + \mathbf{h}(t) \\ \mathbf{r}(t) &= \phi[\mathbf{x}(t)]. \end{aligned} \quad (2)$$

Here,  $\tau$  is the single-neuron time constant,  $\mathbf{W}$  is the synaptic connectivity matrix, and  $\phi[x]$  (applied to  $\mathbf{x}$  element-wise) is a rectified-linear activation function converting internal activations into momentary firing rates. The network is driven by two different inputs shared across all movements: a constant input  $\bar{\mathbf{h}}$  responsible for maintaining spontaneous activity, and a transient input  $\mathbf{h}(t)$  arising at movement onset and decaying through movement. The latter input models the dominant, condition-independent timing-related component of monkey M1 activity during movement (Kaufman et al., 2016). We note that, while the network model is generally nonlinear, it can be well approximated by a linear model ( $\mathbf{r} = \mathbf{x}$ ) as only a small fraction of neurons are silent at any given time (see below); our formal analyses here rely on linear approximations, but all simulations are based on Equations 2 and 3 with nonlinear  $\phi$ .

We calibrated the model for the production of eight rapid straight reaches with bell-shaped velocity profiles (Figure 1C; details in Section S2.3, see also Figure S1). This would later enable comparison with data recorded in monkeys performing similar movements. To perform this calibration, we noted that—in line with the dynamical systems view of movement generation (Shenoy et al., 2013)—movements produced by our model depend strongly on the “initial condition”, i.e. the cortical

state  $\mathbf{x}$  just before movement onset (Churchland et al., 2010b; Afshar et al., 2011). We thus “inverted” the model numerically, by finding eight different initial conditions and a common readout matrix  $\mathbf{C}$  such that the dynamics of the nonlinear model (Equations 2 and 3), seeded with each initial condition, would produce the desired movement. Importantly, we constrained  $\mathbf{C}$  so that its nullspace contained the network’s spontaneous activity state, as well as all eight initial conditions. This constraint ensures that movement does not occur spontaneously, and is a minimum requirement (though not a guarantee) for movement not to occur prematurely during preparation.

We re-analyzed population recordings of monkey M1/PMd during reaching (data courtesy of Mark Churchland, Matt Kaufman and Krishna Shenoy; Section S5), and found that our model captures several essential aspects of movement-related neural dynamics (Figure S5). First, kinematically similar reaches are produced from similar preparatory end-states in both model and monkey. Second, neurons exhibit heterogeneous, multiphasic oscillatory activity that often grow transiently from the preparatory end-state before shrinking back to spontaneous levels (Hennequin et al., 2014). Third, these transients can be summarized as state-space rotations at the population level, as revealed by jPCA (Churchland et al., 2012). Finally, canonical correlations analysis (Sussillo et al., 2015) indicates substantial overlap between monkey and model population activity across time and conditions (Section S5).

### Control of fast movements: preparatory control of cortical activity

Having calibrated our network model of movement generation, we now turn to preparatory dynamics. As stated previously, Shenoy et al.’s dynamical systems perspective suggests that accurate movement execution likely requires careful seeding of the generator’s dynamics with an appropriate, reach-specific initial condition (Afshar et al., 2011). In our model, this means that the activity state  $\mathbf{x}(t)$  of the cortical network must be steered towards the initial condition corresponding to the intended movement (Figure 1B, green). This process, which we call “preparatory control”, forms the core of this study.

An important first step towards formalizing preparatory control and unravelling putative circuit mechanisms is to understand how deviations from “the right initial condition” impact the subsequent movement. Mathematical analysis of our model reveals that depending on the direction in state space along which the deviation occurs, there may be strong motor consequences or none at all (Figure 1D; Section S3). Some preparatory perturbations propagate through the dynamics of the generator network during the movement epoch, modifying its activity trajectories, eventually leading to er-

210 rors in torques and hand motion (“potent perturba- 236  
 211 tions”; Figure 1D, top). Other preparatory perturba- 237  
 212 tions cause subsequent deviations in cortical state tra- 238  
 213 jectories, too, but these deviations are correlated across 239  
 214 neurons in such a way that they cancel in the read- 240  
 215 out, leaving the movement unaltered (“readout-null”; 241  
 216 Figure 1D, middle). Yet other preparatory perturba- 242  
 217 tions are outright rejected by the recurrent dynamics of 243  
 218 the network. These perturbations have little impact on 244  
 219 neuronal activity, let alone on torques and hand motion 245  
 220 (“dynamic-null”; Figure 1D, bottom).

221 The existence of readout-null and dynamic-null direc- 246  
 222 tions imply that, for each movement, many initial condi- 247  
 223 tions give rise to the correct hand trajectory. This sub- 248  
 224 stantially lightens the computational burden of prepara- 249  
 225 tory ballistic control: there are only a few potent direc- 250  
 226 tions in state space along which cortical activity needs 251  
 227 active controlling prior to movement. For our model 252  
 228 with only two readout torques, the effective dimension- 253  
 229 ality of this potent subspace is approx. 5 (Section S3,  
 230 see also Figure S3 and Figure 4). Thus, taking into  
 231 account the energetic cost of neural control, prepara-  
 232 tory dynamics should aim at preferentially eliminating  
 233 errors in preparatory states along those few directions  
 234 that matter for movement.

235 We now formalize these insights in a normative model

of preparatory motor control. We assume that, prior  
 to movement, the initial condition for cortical dynam-  
 ics is progressively reached during a preliminary phase  
 of movement preparation. In this phase, the cortical  
 network receives additional movement-specific control  
 inputs  $\mathbf{u}(t)$  (Figure 1A and B, green) which are rapidly  
 switched off to initiate movement:

$$\tau \frac{d\mathbf{x}}{dt} = -\mathbf{x}(t) + \mathbf{W} \mathbf{r}(t) + \bar{\mathbf{h}} + \mathbf{h}(t) + \mathbf{u}(t) \quad (4)$$

How should these preparatory inputs  $\mathbf{u}(t)$  be chosen? At  
 any time  $t$  during preparation, we can assign a “prospective  
 motor error”  $\mathcal{C}(\mathbf{x})$  to the current cortical state  $\mathbf{x}(t)$ ,  
 equal to the total error in movement that *would* result  
 if movement was initiated at this time (i.e. if control in-  
 puts were suddenly switched off; Section S3). An ideal  
 controller would supply the cortical network with such  
 control inputs  $\mathbf{u}(t)$  as necessary to lower the prospective  
 motor error as fast as possible. This would enable accu-  
 rate movement production in short order. We therefore  
 propose the following cost functional:

$$\mathcal{J}[\mathbf{u}(t)] = \int_0^\infty \mathcal{C}(\mathbf{x}(t)) + \lambda \mathcal{R}(\mathbf{u}(t)) dt \quad (5)$$

where  $\mathcal{R}(\mathbf{u})$  is an energetic cost which penalizes large  
 control signals, and  $\lambda$  sets its relative importance in the  
 overall cost. Note that  $\mathbf{x}(t)$  depends on  $\mathbf{u}(t)$  via Equa-  
 tion 4.

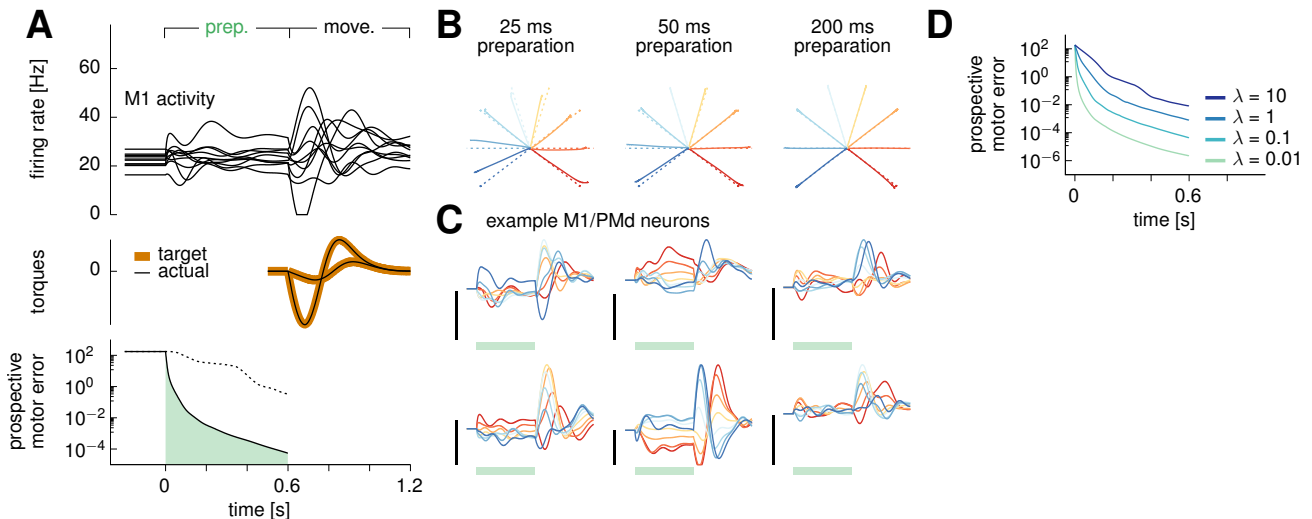

**Figure 2: Optimal preparatory control.** (A) Dynamics of the model during optimal preparation and execution of a straight reach at 0-degree angle. Optimal control inputs are fed to the cortical network during preparation, and subsequently withdrawn to elicit movement. Top: firing rates of a selection of ten model neurons. Middle: generated torques (black), compared to targets (brown). Bottom: the prospective motor error  $\mathcal{C}[\mathbf{x}(t)]$  quantifies the accuracy of the movement if it were initiated at time  $t$  during the preparatory phase. Under the action of optimal control inputs,  $\mathcal{C}[\mathbf{x}(t)]$  decreases very fast, until it becomes small enough that an accurate movement can be triggered. The control input is calculated so as to minimize the green area under the curve over an infinite preparation horizon (only 600 ms of which are shown here), plus an energy cost that prevents control inputs from growing unrealistically large (Equation 5). The dashed line shows the evolution of the prospective cost for the naive static strategy (see text). (B) Hand trajectories for each of the eight reaches (solid), following optimal preparation over a window of 25 ms (left), 50 ms (center) and 200 ms (right). Dashed lines show target movements. (C) Firing rates of six example neurons, for each movement (color-coded as in B). Green bars mark the 600 ms preparation window, black scale bars indicate 20 Hz. (D) Prospective motor error (averaged over the eight reaches) during preparation for different values of the energy penalty parameter  $\lambda$ . In (A-C), we used  $\lambda = 0.1$ .



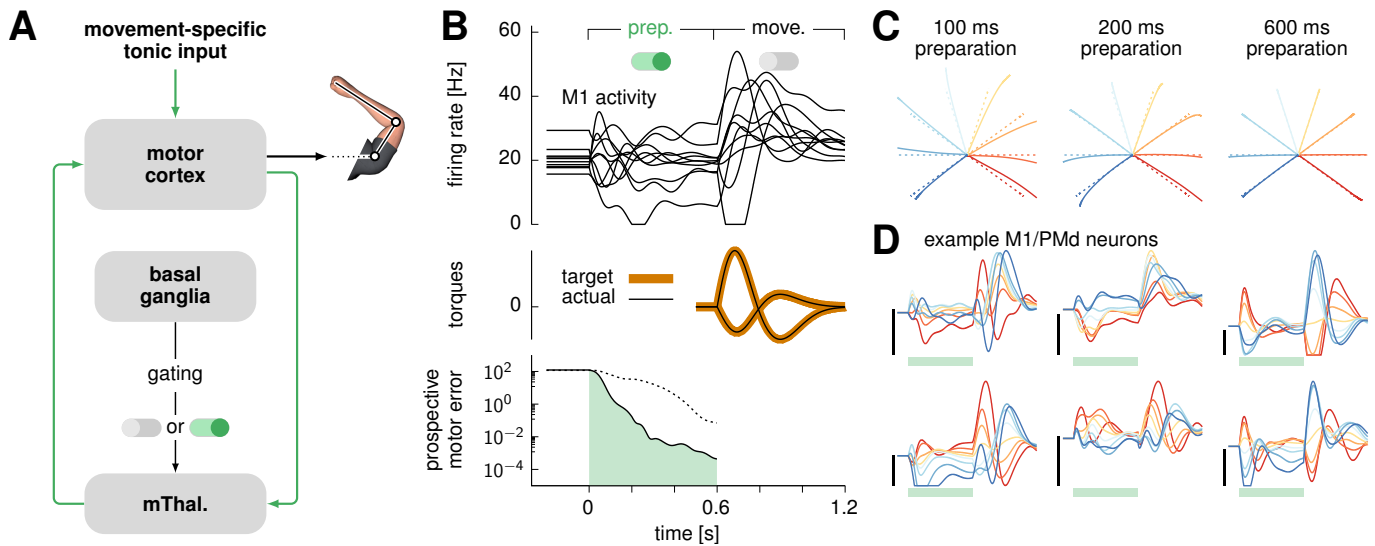

Figure 3: **Optimal movement preparation via a gated thalamo-cortical loop.** (A) Proposed circuit architecture for the optimal movement preparation (cf. text). (B) Cortical activity (top; 10 example neurons), generated torques (middle), and prospective motor error (bottom) during the course of movement preparation and execution in the circuit architecture shown in (A). Prospective motor error for the naive strategy is shown with a dotted line as in Figure 2A. (C) Hand trajectories (solid) compared to target trajectories (dashed) for the eight reaches, triggered after 100 ms (left), 200 ms (middle) and 600 ms (right) of motor preparation. (D) Firing rates of six example cortical neurons in the model. Green bars mark the 600 ms preparation window, during which the thalamus is disinhibited. Vertical scale bars denote 20 Hz.

## Optimal preparatory control

When (i) the prospective motor error  $\mathcal{C}$  is quadratic in the output torques  $\mathbf{m}$ , (ii) the energy cost  $\mathcal{R}$  is quadratic in  $\mathbf{u}$ , and (iii) the network dynamics are linear, then minimizing Equation 5 corresponds to the well-known linear quadratic regulator problem in control theory (Skogestad and Postlethwaite, 2007). The optimal solution is a combination of a constant input and instantaneous (linear) state feedback,

$$\mathbf{u}_{\text{opt}}(t) = \mathbf{u}^* + \mathbf{K} \delta \mathbf{x}(t), \quad (6)$$

where  $\delta \mathbf{x}(t)$  is the momentary deviation of  $\mathbf{x}$  from the desired initial condition. In Equation 6, the constant input  $\mathbf{u}^*$  is movement specific, but the optimal gain matrix  $\mathbf{K}$  is generic; both can be derived in algebraic form (Section S4.2). Thus, even though the actual movement occurs in “open loop” (without corrective sensory feedback), optimal movement preparation occurs in closed loop, with the state of the pattern generator being controlled via internal feedback in anticipation of the movement.

When applied to our model system, the optimal control inputs lead to naturalistic transient dynamics in the cortical network during motor preparation (Figure 2A, top, and Figure 2C). The prospective motor error decreases very quickly to negligible values (Figure 2A, bottom; note the small green area under the curve) as  $\mathbf{x}(t)$  is driven into the appropriate subspace. After the preparatory feedback loop is switched off and movement begins, the system accurately produces the desired torques and hand trajectories (Figure 2A, middle, and Figure 2B,

right). Indeed, movements are ready to be performed after as little as 50 ms of preparation time (Figure 2B). We note, though, that it is possible to achieve an arbitrarily small motor cost, and therefore arbitrarily fast preparation, by decreasing the energy penalty factor  $\lambda$  in Equation 5 (Figure 2D). However, this is at the price of unrealistically large control inputs, i.e. large energetic costs  $\mathcal{R}(\mathbf{u})$  (Section S4.3).

Importantly, feedback control vastly outperforms a naive preparation strategy which uses a simpler, constant feedforward input  $\mathbf{u}(t) = \mathbf{u}^*$  and ignores the error feedback term ( $\mathbf{K} = 0$  in Equation 6). Under this naive strategy, network activity successfully settles in the desired initial condition eventually, but undergoes large initial transients in directions of high cost at preparation onset. These transients dramatically delay the eventual decay of the prospective motor error (Figure 2A, bottom, dashed line).

## Circuit model for preparatory control: a gated thalamocortical loop

So far we have not discussed the source of optimal preparatory inputs  $\mathbf{u}(t)$ , other than saying that they close a feedback loop from the cortex onto itself (Equation 6). While such a loop could in principle be absorbed in local modifications of recurrent cortical connectivity (Sussillo and Abbott, 2009), this would preclude the flexible, near-instant ON/OFF switching of the control loop required at onset of preparation (ON) and movement (OFF). If, instead, the preparatory loop were

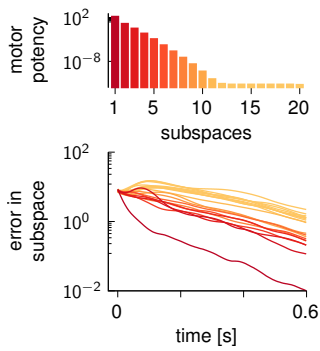

Figure 4: **Selective elimination of preparatory errors along potent directions.** **Top:** 200 orthogonal state-space directions were identified, going from the most to the least “motor potent” (c.f. text). These directions were ordered and grouped into twenty 10-dimensional subspaces. The average motor potency in each subspace is shown here, as measured by the prospective motor error  $\mathcal{C}$ . **Bottom:** the state of the cortical network in the thalamo-cortical model of Figure 3 was artificially set to deviate randomly from the target movement-specific initial state at time  $t = 0$ , prior to movement preparation. The squared Euclidean deviation from target (averaged over trials and movements) is decomposed into contributions from the twenty subspaces, and shown using a consistent color code.

316 to pass through another brain area, fast modulation of  
 317 excitability in that relay area would provide a rapid  
 318 and flexible switch. We therefore propose the circuit  
 319 model shown in Figure 3A, where the motor thalamus  
 320 acts as a relay station for cortical feedback (Guo  
 321 et al., 2017; Nakajima and Halassa, 2017). The loop  
 322 is gated ON/OFF at preparation onset/offset by the  
 323 (dis)-inhibitory action of basal ganglia outputs (Jin and  
 324 Costa, 2010; Cui et al., 2013; Halassa and Acsády, 2016;  
 325 Logiaco et al., 2019). Specifically, cortical excitatory  
 326 neurons project to 160 thalamic neurons, which make  
 327 excitatory backprojections to a pool of 100 excitatory  
 328 (E) and 100 inhibitory (I) neurons in cortex layer 4. In  
 329 turn, these layer 4 neurons provide both excitation and  
 330 inhibition to the main cortical network, thereby closing  
 331 the control loop. Here, inhibition is necessary to cap-  
 332 ture the negative nature of optimal feedback. In addi-  
 333 tion to thalamic input, the cortical network also receives  
 334 a movement-specific constant drive during preparation  
 335 (analogous to  $\mathbf{u}^*$  in Equation 6 for the standard LQR  
 336 algorithm).

337 The detailed patterns of synaptic efficacies in the  
 338 thalamo-cortical loop are obtained by solving the same  
 339 control problem as above, based on the minimization  
 340 of the cost functional in Equation 5 (mathematical de-  
 341 tails in Section S4). Importantly, the solution must now  
 342 take into account some key biological constraints: (i)  
 343 feedback must be based on the activity of the cortical  
 344 E neurons only, (ii) thalamic and layer-4 neurons have  
 345 intrinsic dynamics that introduce lag, and (iii) the sign  
 346 of each connection is constrained by the nature of the  
 347 presynaptic neuron (E or I).

348 The circuit model we have obtained enables flexible,  
 349 near-optimal anticipatory control of the reaching move-  
 350 ments (Figure 3B). During spontaneous activity, thalam-  
 351 ic neurons are silenced due to strong inhibition from  
 352 basal ganglia outputs (not explicitly modelled), keeping  
 353 the thalamocortical loop open (inactive) by default. At  
 354 the onset of movement preparation, rapid and sustained  
 355 disinhibition of thalamic neurons restores responsive-  
 356 ness to cortical inputs, thereby closing the control loop  
 357 (ON/OFF switch in Figure 3B, top). This loop drives the  
 358 cortical network into the appropriate preparatory sub-  
 359 space, rapidly reducing prospective motor errors (Fig-  
 360 ure 3B). To trigger movement, the movement-specific  
 361 tonic input to cortex is shut off, and the basal ganglia

362 resume sustained inhibition of the thalamus. Thus, the  
 363 loop re-opens, which sets off the uncontrolled dynamics  
 364 of the cortical network from the right initial condition  
 365 to produce the desired movement (Figure 3C).

## 366 Selective elimination of preparatory er- 367 rors

368 The neural trajectories under optimal preparatory con-  
 369 trol display a striking property, also observed in monkey  
 370 M1 and PMd recordings (Ames et al., 2014; Lara et al.,  
 371 2018; Discussion): by the time movement is ready to be  
 372 triggered (approx. 100 ms), the firing rates of most neu-  
 373 rons have not yet converged to the values they would  
 374 attain after a long preparation time (Figure 3B and D)  
 375 — that is,  $\|\delta\mathbf{x}(t)\| \gg 0$ . We found we could readily  
 376 explain this effect by systematically searching for po-  
 377 tent and null directions (thus generalizing Figure 1D)  
 378 and examining how much each direction contributes to  
 379 preparatory deviations  $\delta\mathbf{x}(t)$ . Specifically, we calculated  
 380 a full set of orthogonal directions ranking from most  
 381 to least motor-potent, with “potency” measured by the  
 382 prospective motor error  $\mathcal{C}$  (an analytical solution exists  
 383 for linear systems; Section S3). For easier visualiza-  
 384 tion, we grouped these successive directions into twenty  
 385 10-dimensional subspaces. We found that motor po-  
 386 tency decreases steeply from one subspace to the next  
 387 (Figure 4, top), indicating that preparatory deviations  
 388 are inconsequential along most state-space directions.  
 389 If this could explain early motor readiness despite un-  
 390 settled firing rates, one would expect  $\delta\mathbf{x}(t)$  to shrink  
 391 very quickly along directions with motor consequences,  
 392 while persisting (or even growing) along motor-null di-  
 393 rections. To verify this, we artificially set  $\mathbf{x}(t)$  at prepa-  
 394 ration onset to deviate from the target initial state in a  
 395 random direction in each trial. Examining the dynamics  
 396 of  $\delta\mathbf{x}(t)$  in the various subspaces (averaging squared con-  
 397 tributions across many trials), we confirmed that errors  
 398 are selectively eliminated along directions with motor  
 399 consequences, while they linger or even grow in other,  
 400 inconsequential directions (Figure 4, bottom).

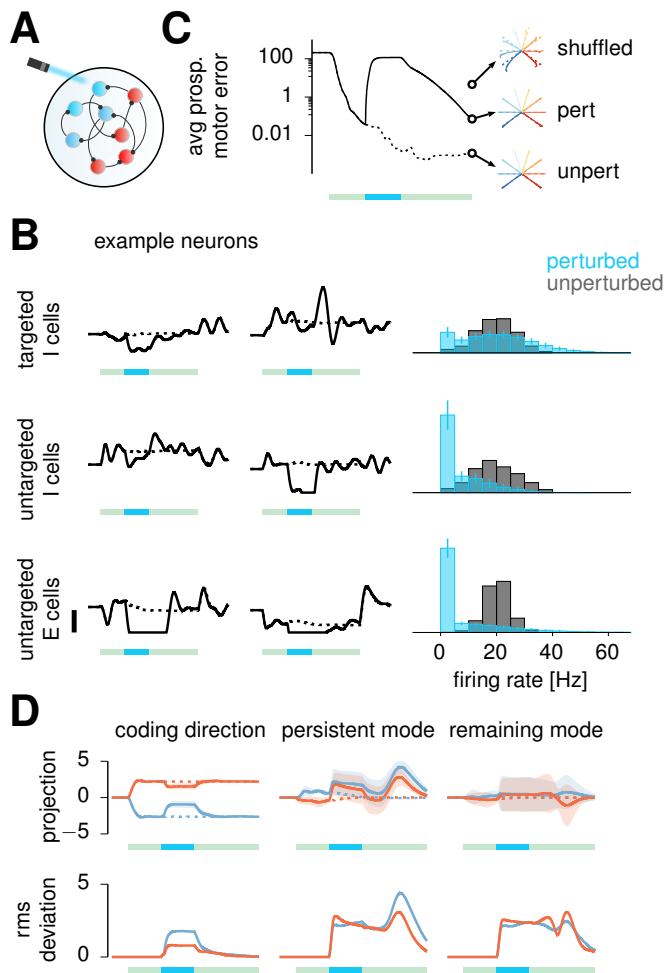

**Figure 5: Effect of perturbations.** (A) Illustration of perturbation via “photoinhibition”: a subset (60%) of I neurons in the model are driven by strong positive input. (B) Left: firing rates (solid: perturbed; dashed: unperturbed) for a pair of targeted I cells (top), untargeted I cells (middle) and E cells (bottom). Green bars (1.6 s) mark the movement preparation epoch, and embedded turquoise bars (400 ms) denote the perturbation period. Right: population histograms of firing rates observed at the end of the perturbation (turquoise), and firing rates observed at the same time in unperturbed trials (gray). Error bars show one standard deviation across 300 experiments, each with a different random set of targeted I cells. (C) Prospective motor error (in perturbed (solid) vs. unperturbed (dashed) conditions). Subsequent hand trajectories are shown for one experiment of each condition (middle and bottom insets). These are compared with the reaches obtained by randomly shuffling the deviation of the final perturbed preparatory state from target initial condition across neurons, and simulating the cortical dynamics thereafter (top inset; see also text). Target reaches are shown as dashed lines. (D) Analysis of perturbation and recovery for the case of two movements (left and right reaches; same color code as in (C)). Top: cortical activity projected along the coding direction (left), the persistent mode (middle), and the remaining mode (right; see text). Traces are shown as mean (solid)  $\pm$  std. (shaded) across perturbation experiments, and compared with the unperturbed condition (dashed). Bottom: corresponding root-mean-square deviation between perturbed and unperturbed projections across experiments. Green and turquoise bars as in (B).

## 401 Selective recovery from photoinhibition

402 The selective elimination of preparatory errors also  
 403 makes predictions for the manner in which the circuit  
 404 should recover from perturbations. In recent years, neu-  
 405 rophysiologists have begun to dissect the causal circuit  
 406 mechanisms responsible for movement planning, by sys-  
 407 tematically perturbing activity in various brain struc-  
 408 tures (Li et al., 2016; Guo et al., 2017; Gao et al., 2018;  
 409 Sauerbrei et al., 2019), and analyzing population record-  
 410 ings during recovery. We performed similar perturba-  
 411 tions and analyses in our circuit model of Figure 3 to  
 412 shed new light on preparatory motor control (Figure 5).

413 As our E/I cortical circuit model operates in the  
 414 inhibition-stabilized regime (Hennequin et al., 2014;  
 415 Tsodyks et al., 1997; Ozeki et al., 2009; Sanzeni et al.,  
 416 2019), we were able to use the same photoinhibition  
 417 strategy as used in these experimental studies to silence  
 418 the cortical network (Figure 5A). We provided strong  
 419 excitatory input to a random subset (60%) of inhibitory  
 420 neurons, for a duration of 400 ms starting 400 ms after  
 421 preparation onset. We found that “photoinhibition” has  
 422 mixed effects on the targeted neurons: some are caused  
 423 to fire at higher rates, but many are paradoxically sup-  
 424 pressed (Figure 5B, top). For E cells and untargeted  
 425 I cells, though, the effect is uniformly suppressive, as

426 shown in Figure 5B (middle and bottom).

427 The perturbation transiently resets the prospective mo-  
 428 tor error to pre-preparation level, thus nullifying the  
 429 benefits of the first 400 ms of preparation (Figure 5C).  
 430 Following the end of the perturbation, the prospective  
 431 motor error decreases again, but does not fully recover  
 432 to its final value in unperturbed trials (Figure 5C, solid  
 433 vs. dashed). Nevertheless, it recovers to sufficiently  
 434 low values as to enable accurate movement produc-  
 435 tion (compare middle and bottom hand trajectories in  
 436 Figure 5C). This is due to the selective elimination of  
 437 preparatory errors discussed earlier (Figure 4): indeed,  
 438 shuffling the deviation of  $\mathbf{x}(t)$  from the target initial  
 439 state across neurons (i.e. uniformizing the distribution  
 440 of errors in different state space directions) leads to a  
 441 much higher prospective motor error, and eventually to  
 442 impaired hand trajectories (Figure 5C, top right).

443 We next performed an analysis qualitatively similar to  
 444 that conducted by Li et al. in the context of a task  
 445 where mice had to report the location of a tactile stimu-  
 446 lus through directed licking after a delay period. For  
 447 comparison with the lick-left and lick-right movement  
 448 conditions, we trimmed our model to only two move-  
 449 ments, the left and the right reaches. We identified a  
 450 “coding direction” (CD) that maximally separates firing

451 rates in left and right reaches towards the end of move-  
452 ment preparation in unperturbed trials (Section S4.9).  
453 Similarly, we identified a “persistent” mode (PM) that  
454 maximally separates firing rates in perturbed and un-  
455 perturbed conditions towards the end of preparation,  
456 regardless of the reach direction. Finally, as in Li et al.  
457 (2016), we chose a third mode orthogonal to the PM and  
458 the CD which captures most of the remaining variance  
459 across the two reaches and perturbation conditions.

460 As Li et al. observed in the anterior lateral motor  
461 cortex (ALM) of mice, the CD and the PM modes  
462 are nearly orthogonal (89-degree angle) even though  
463 not constrained to be so. Moreover, the perturbation  
464 causes cortical activity to transiently deviate from un-  
465 perturbed trajectories nearly equally along each of the  
466 three modes (Figure 5D). Remarkably, however, activ-  
467 ity recovers promptly along the CD, but not along the  
468 other two modes — as in Li et al. (2016). In fact, the  
469 perturbation even grows transiently along the PM dur-  
470 ing early recovery. Such selective recovery can again be  
471 understood from optimal preparation eliminating errors  
472 along directions with motor consequences, but (owing to  
473 energy constraints) not in other inconsequential modes.  
474 Indeed, the CD is by definition a motor-potent direc-  
475 tion: its contribution to the preparatory state is what  
476 determines whether the movement will be a left reach  
477 or a right reach. In contrast, the PM and the third  
478 mode are approximately motor-null (respectively 4339  
479 times and 2286 times less motor-potent than the CD, by  
480 our measure  $\mathcal{C}$  of motor potency). Thus, the dynamics  
481 of the closed-loop circuit have no incentive to quench  
482 perturbation-induced deviations along these modes. In  
483 sum, the dynamics of mouse ALM during this task are  
484 consistent with our model of optimal preparatory con-  
485 trol.

## 486 Selective quenching of variability during 487 motor preparation

488 The selective elimination of motor-potent preparatory  
489 errors is a central feature of the optimal control al-  
490 gorithm. Yet, experimental tests of this prediction  
491 in reaching monkeys would involve circuit perturba-  
492 tions analogous to those performed in mice (c.f. above),  
493 at a spatial resolution finer than currently achievable  
494 (O’Shea et al., 2018). Nevertheless, we reasoned that  
495 other signatures of this prediction might be present in  
496 the fine structure of trial-by-trial variability in popula-  
497 tion activity, which can be readily estimated in existing  
498 datasets.

499 To flesh out the specific predictions of our optimal con-  
500 trol hypothesis for variability, we introduced stochastic-  
501 ity in the input to every neuron, in the form of inde-  
502 pendent Gaussian noise processes (Section S5.6). These  
503 noisy inputs propagate through the recurrent dynam-  
504 ics, and cause variability in the firing rate of each neu-  
505 ron across time and trials (Hennequin et al., 2018).

506 We found that firing rate variability drops at prepara-  
507 tion onset (Figure 6A, lightest purple), consistent with  
508 the drop in Fano factor previously reported in monkey  
509 M1/PMd (Churchland et al., 2006b, 2010b) — and re-  
510 produced here in our own analysis of the monkey data  
511 (Figure 6B). Although variability suppression in the  
512 model was relatively mild on average, we found that  
513 the effect grew as we added “phantom muscles” to the  
514 model. Specifically, we noted that the solution to the  
515 optimal preparation problem (Equation 6) does not de-  
516 pend on the details of the desired “muscle” (i.e. torques)  
517 activities, but only on the way they are read out from  
518 the cortical population (the readout matrix  $\mathbf{C}$  in Equa-  
519 tion 1). We thus artificially increased the dimension-  
520 ality of the network readout, and observed increasingly  
521 strong variability suppression (Figure 6A, shades of pur-  
522 ple).

523 A formal mathematical analysis of variability in the  
524 model explains this quenching effect (Section S5.6), and  
525 can be summarized as follows. For a linearized model  
526 under white noise input (a useful limit), the momentary  
527 deviation from trial-average response (residual) at any  
528 time in any trial is the superposition of the network’s  
529 responses to a series of past consecutive noisy impulses  
530 (“impulse responses”). At preparation onset, the *effec-*  
531 *tive* recurrent connectivity of the cortical network is al-  
532 tered by the sudden addition of the thalamocortical loop  
533 pathway (Nakajima and Halassa, 2017). This modifies  
534 the impulse response of the system, such that activity is  
535 pulled towards the desired preparatory end-state more  
536 strongly than during spontaneous dynamics. Thus, in  
537 each of the superimposing responses contributing to the  
538 momentary activity fluctuations, residuals decay faster  
539 overall than they would normally outside the prepa-  
540 ration epoch. This results in overall variability sup-  
541 pression. Notably, with a higher-dimensional readout  
542 (more muscles), a greater number of state space direc-  
543 tions are constrained by the optimal control strategy, i.e.  
544 are caused to decay faster than usual by the thalamo-  
545 cortical loop. This explains why variability suppression  
546 grows with the number of muscles (Figure 6A, darker  
547 purples).

548 Importantly, because prospective errors decay faster  
549 along motor-potent preparatory directions (Figure 4),  
550 the model should exhibit selective quenching of trial-  
551 by-trial variability in these directions. To verify this, we  
552 decomposed firing rate variability in the model into con-  
553 tributions from potent and non-potent state space di-  
554 rections, using the same orthogonal basis as used previ-  
555 ously in Figure 4. We confirmed that during the prepa-  
556 ration epoch, variability is more strongly quenched in  
557 potent directions than in null directions (Figure 6C).

558 We then sought to test this model prediction by ana-  
559 lyzing the structure of variability in the monkey data.  
560 We reasoned that, although it is difficult to determine  
561 the motor potency of a given state space direction in  
562 the recorded population, one subspace is almost cer-  
563 tainly potent: the subspace spanned by all pairwise differ-



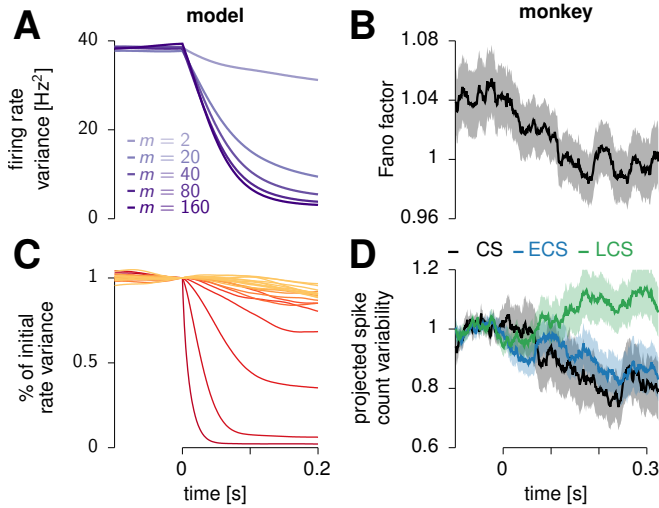

Figure 6: **Selective quenching of across-trial spike count variability in model and monkey.** (A) Across-trial firing rate variance in the model, averaged across cells and reach conditions. Different lines denote different numbers of “muscles” involved in the movement (see text). (B) Fano factor averaged over all neurons and reach conditions in the monkey data (shaded area:  $\pm$  s.e.m.). (C) Firing rate variance decomposed in the twenty 10-dimensional subspaces of Figure 4 (same color code), in our base model with two “muscles” ( $m = 2$ ). Traces are normalized to the variance obtained at preparation onset ( $t = 0$ ). (D) Spike count co-variability in the monkey data, projected onto the coding subspace (CS, black), the early-change subspace (ECS, blue), and the late-change subspace (LCS, green). Values are normalized by the average projected variance in the 100 ms window preceding preparation onset ( $t = 0$ ). See text for details. Shaded areas denote  $\pm$  s.e.m. (bootstrap). In (B) and (D), 123 neurons (single and multi-units) were analyzed across 8 straight reaches. Spikes were aligned onto target onset, and only trials with a delay period longer than 400 ms were analyzed (an average of  $\approx 26$  per condition).

ences between the eight reach-specific preparatory endpoints. Indeed, the contribution of this subspace to late preparatory activity is what determines the upcoming reach. Therefore we call this subspace the “coding subspace”, in analogy with Li et al.’s “coding direction” (c.f. above). Conversely, since accurate reaches can be made as early as 100 ms after movement instruction, fluctuations in trial-averaged firing rates that occur late in the delay period are likely inconsequential. We thus extracted the state space directions corresponding to these late changes, to obtain a subspace we call the “late-change subspace” (LCS; Section S5.6). Finally, we also reasoned that another independent estimation of the potent subspace could be obtained by considering *early* changes in mean preparatory activity. Indeed, under optimal control, these changes should occur predominantly along potent dimensions (Figure 4). We thus collected the within-condition activity differences between early and mid-preparation, to obtain an “early-change subspace” (ECS), presumably potent. To avoid double-counting the CS (likely the most reliable estimate of potent directions), we further constrained the ECS and the LCS to be orthogonal to the CS.

Having identified putative potent and null directions using trial-averaged responses only, we next partitioned across-trial variability in these different subspaces. Specifically, for each time  $t$ , neuron  $i$ , reach condition  $m$  and trial  $k$ , we counted the number of spikes  $c_{imk}(t)$  that fell in a 150 ms-long window centered on  $t$ . We then constructed normalized residuals,

$$\tilde{c}_{imk}(t) = \frac{c_{imk}(t)}{\sqrt{\mu_{im}(t)}} - \sqrt{\mu_{im}(t)} \quad (7)$$

where  $\mu_{im}$  is the average of  $c_{imk}$  across trials (note that in particular, the mean of  $\tilde{c}_{imk}$  over trials is zero). This construction recovers the standard Fano factor as the

across-trial mean of  $\tilde{c}_{imk}^2$ , but also lets us generalize the Fano factor to measure spike count co-variability more specifically along any state space direction  $\mathbf{d}$ , as

$$\mathcal{V}(\mathbf{d}, t) = \langle (\mathbf{d}^T \tilde{\mathbf{c}}_{\bullet mk}(t))^2 \rangle_{mk} \quad (8)$$

Here,  $\tilde{\mathbf{c}}_{\bullet mk} = (\tilde{c}_{1mk}, \tilde{c}_{2mk}, \dots, \tilde{c}_{Nmk})^T$  denotes the population vector of normalized spike count residuals in condition  $m$  and trial  $k$ , and  $\langle \cdot \rangle_{mk}$  denotes an average over all conditions and trials. To compute variability in each of the three subspaces, we averaged  $\mathcal{V}(\mathbf{d}, t)$  over a set of orthogonal directions  $\mathbf{d}$  defining the subspace, weighted by their contributions to the subspace (Section S5.6). We found that, as predicted by our model, the suppression of shared variability in M1/PMd activity is selective. Spiking variability is most strongly reduced in the two putative potent subspaces (Figure 6D, “CS” and “ECS”), but not in the presumed null subspace (Figure 6D, “LCS”). Together, these results support our optimal preparatory control hypothesis.

## Reorganization between preparatory and movement responses

Finally, our model also accounts for a prominent feature of monkey M1/PMd responses during motor preparation and execution: across time and reach conditions, activity spans orthogonal subspaces during the two epochs. To show this, we followed Elsayed et al. and performed principal components analysis (PCA) on model and monkey trial-averaged activity during the two epochs separately (Section S5.4; Figure 7A). We then examined the fraction of variance explained by both sets of principal components (prep-PCs and move-PCs) during each epoch. Consistent with the monkey data, prep-PCs accounted for most of the activity vari-

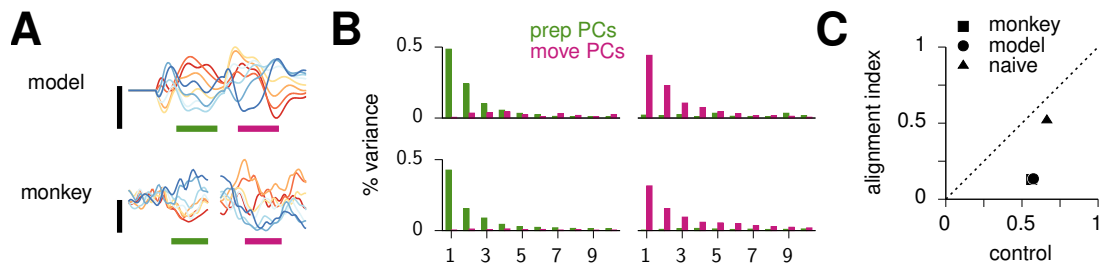

Figure 7: **Reorganization between preparatory and movement activity in model and monkey.** (A) Example single-neuron PSTHs in model (top) and monkey M1/PMd (bottom), for each of the eight movement conditions. For the model, these were already shown in Figure 2B. The monkey performed similar, though not identical, straight reaches (Figure S5). (B) Fraction of variance explained during movement preparation (left) and execution (right) by principal components calculated from preparatory (green) and movement-related (magenta) trial-averaged activity (Section S5.4). Only the first 10 components are shown for each. Variance is across reach conditions and time in 300 ms prep. and move. windows indicated by green and magenta bars in (A). (C) Alignment index (calculated as in Elsayed et al., 2016) for the monkey data (square), our optimal circuit model of Figure 3 (circle, overlapping with the square) and the naive control strategy based on static control inputs (triangle). Control values refer to the average alignment index between random subspaces drawn as in Elsayed et al., 2016 (see text and Section S5.4).

628 ance during preparation (by construction; Figure 7B, 629 left), but accounted for little variance during move- 630 ment (Figure 7B, right). Similarly, move-PCs captured 631 little of the preparatory-epoch activity variance. We 632 further quantified this (lack of) overlap using Elsayed 633 et al.’s “alignment index”, defined as the amount of 634 preparatory-epoch activity variance captured by the top 635  $K$  move-PCs. This is further normalized by the maxi- 636 mum amount of variance that any  $K$ -dimensional sub- 637 space can capture. Here,  $K$  is chosen such that the top 638  $K$  prep-PCs capture 85% of activity variance during the 639 preparatory-epoch (model,  $K = 4$ ; monkey,  $K = 12$ ). 640 Both model and monkey data had a low alignment index 641 ( $\approx 0.1$ ), much below that expected if the prep. and 642 move. subspaces had been chosen randomly within a 643 relevant constrained subspace (“random” control in El- 644 sayed et al., 2016; Figure 7C).

645 In the model, orthogonality between prep. and move. 646 subspaces arises primarily due to the “nonnormality” 647 of the connectivity matrix  $\mathbf{W}$  (Hennequin et al., 2014; 648 Trefethen and Embree, 2005). As shown previously in 649 Hennequin et al. (2014), the dynamics of our generator 650 network amplify a select set of initial conditions, from 651 which population activity quickly grows, rotates away, 652 oscillates in new orthogonal dimensions, and eventually 653 decays. Since multiphasic torque patterns must be as- 654 sembled from the network’s activity during movement, 655 our model calibration procedure (cf. above) tends to 656 discover movement-specific initial conditions that be- 657 long precisely to this special set. This explains why 658 movement-related activity is orthogonal to *late* prepara- 659 tory activity in our model. Under the optimal control 660 law, activity converges fast to the relevant subspace, 661 hence the low alignment index overall. Under the naive 662 strategy, convergence is much slower (Figure 2A, dashed 663 line), indeed yielding a comparatively large alignment 664 index (Figure 7C, triangle).

## 665 Discussion

666 Neural population activity in cortex can be accu- 667 rately described as arising from low-dimensional dy- 668 namics (Churchland et al., 2012; Mante et al., 2013; 669 Carnevale et al., 2015; Seely et al., 2016; Barak, 2017; 670 Cunningham and Byron, 2014; Michaels et al., 2016). 671 These dynamics unfold from a specific initial condition 672 on each trial, and indeed these “preparatory states” pre- 673 dict the subsequent evolution of both neural activity and 674 behaviour in single trials of the task (Churchland et al., 675 2010b; Pandarinath et al., 2018; Remington et al., 2018; 676 Sohn et al., 2019). In addition, motor learning may rely 677 on these preparatory states partitioning the space of 678 subsequent movements (Sheahan et al., 2016).

679 How are appropriate initial conditions reached in the 680 first place? Here, we have formalized movement prepa- 681 ration as an optimal control problem, showing how 682 to translate anticipated motor costs phrased in terms 683 of muscle kinematics into costs on neural activity in 684 M1. Optimal preparation minimizes these costs, and 685 the solution is feedback control: the cortical network 686 must provide corrective feedback to itself, based on 687 the prospective motor error associated with its current 688 state. In other words, optimal preparation may rely 689 on an implicit forward model (Wolpert et al., 1995; 690 Desmurget and Grafton, 2000; Scott, 2012), whereby 691 the future motor consequences of *preparatory activity* 692 (not motor commands, as in classical theories) are pre- 693 dicted and fed back for online correction of the cortical 694 trajectory.

## 695 Thalamic control of cortical dynamics

696 The mathematical structure of the optimal control 697 solution suggested a circuit model based on cortico- 698 cortical feedback. We have proposed that optimal feed-

699 back can be implemented as a cortico-thalamo-cortical  
700 loop, switched ON during movement preparation and  
701 OFF again at movement onset. The ON-switch occurs  
702 through fast disinhibition of those thalamic neurons  
703 that are part of the loop. Our model thus predicts a  
704 large degree of specificity in the synaptic interactions  
705 between cortex and thalamus (Halassa and Sherman,  
706 2019), as well as a causal involvement of the thalamus  
707 in movement preparation (Guo et al., 2017; Sauerbrei  
708 et al., 2019). Furthermore, the dynamical entrainment  
709 of thalamus with cortex predicts tuning of thalamic neu-  
710 rons to task variables, consistent with a growing body  
711 of work showing specificity in thalamic responses (Naka-  
712 jima and Halassa, 2017; Guo et al., 2017; Rikhye et al.,  
713 2018). For example, we predict that neurons in the  
714 motor thalamus should be tuned to movement proper-  
715 ties, for much the same reasons that cortical neurons  
716 are (Todorov, 2000; Lillicrap and Scott, 2013; Omrani  
717 et al., 2017).

718 Thalamic control of cortical dynamics offers a particu-  
719 larly attractive way of performing nonlinear computa-  
720 tions (Sussillo and Abbott, 2009; Logiaco et al., 2019).  
721 Although both preparatory and movement-related dy-  
722 namics are approximately linear in our model, the tran-  
723 sition from one to the other (orchestrated by the basal  
724 ganglia) is highly nonlinear. Indeed, our model can be  
725 thought of as a switching linear dynamical system (Lin-  
726 derman et al., 2017). Moreover, gated thalamocortical  
727 loops are a special example of achieving nonlinear ef-  
728 fects through gain modulation. Here, it is the thalamic  
729 population only that is subjected to abrupt and binary  
730 gain modulation, but changes in gain could also affect  
731 cortical neurons. This was proposed recently as a way  
732 of expanding the dynamical repertoire of a cortical net-  
733 work (Stroud et al., 2018).

734 Switch-like nonlinearities may have relevance beyond  
735 movement preparation, e.g. for movement execution. In  
736 our model, different movement patterns are produced  
737 by different initial conditions seeding the same gener-  
738 ator dynamics. However, we could equally well have  
739 generated each reach using a different movement-epoch  
740 thalamocortical loop. This would account for the re-  
741 cent demonstration that thalamus drives cortex during  
742 the production of skilled movements in mice (Sauerbrei  
743 et al., 2019). Logiaco et al. have recently explored this  
744 possibility, showing that gated thalamocortical loops  
745 provide an ideal substrate for flexible sequencing of mul-  
746 tiple movements. In their model, each movement is  
747 achieved by its own loop (involving a shared cortical  
748 network), and the basal ganglia orchestrate a chain of  
749 thalamic disinhibitory events, each spatially targetted  
750 to activate those neurons that are responsible for the  
751 next loop in the sequence (Logiaco et al., 2019). In-  
752 terestingly, their cortical network must still be properly  
753 initialized prior to each movement chunk, as it must in  
754 our model. For this, they proposed a generic prepara-  
755 tory loop similar to the one we have studied here. How-  
756 ever, theirs does not take into account the degenera-

757 cies in preparatory states induced by prospective mo-  
758 tor costs, which ours exploits. In sum, our two models  
759 address complementary facets of motor control (prepa-  
760 ration and sequencing), and could be combined into a  
761 single model.

## 762 Sloppy preparation for accurate movements

763 Two elements might mitigate the need for exquisite con-  
764 trol of cortical preparatory states. First, ongoing move-  
765 ments can be corrected rapidly based on sensory feed-  
766 back, presumably enabling compensation for a “bad  
767 start” (Scott et al., 2015). Second, as we found, the  
768 mapping from initial condition to movement may be  
769 many-to-one, and optimal control dictates that only  
770 those components of the initial condition that matter for  
771 the subsequent movement ought to be controlled during  
772 preparation. Indeed, this feature of our model readily  
773 explains two distinctive features of preparatory activity  
774 in reaching monkeys: (i) that pre-movement activity on  
775 zero-delay trials needs not reach the state achieved for  
776 long movement delays (Ames et al., 2014), and (ii) that  
777 nevertheless movement is systematically preceded by ac-  
778 tivity in the same preparatory subspace irrespective of  
779 whether the reach is self-initiated, artificially delayed,  
780 or reactive and fast (Lara et al., 2018). In our model,  
781 preparatory activity converges rapidly in the subspace  
782 that matters, such that irrespective of the delay (above  
783 50 ms), preparatory activity is always found to have  
784 some component in this common subspace as in Lara  
785 et al. (2018). Moreover, exactly which of the many ac-  
786 ceptable initial conditions is reached by the end of the  
787 delay depends on the delay duration. Thus, our model  
788 predicts that different late-preparation states will be  
789 achieved for short and long delays, consistent with the  
790 results of Ames et al. (2014). Moreover, the state our  
791 model achieves at the end of a preparation epoch also  
792 depends on activity prior to preparation onset; there-  
793 fore, it also depends on whether preparation started  
794 from scratch, or was initiated by a change in target that  
795 interrupted a previous preparatory process half way, as  
796 observed by Ames et al.

## 797 Selective suppression of cortical variability dur- 798 ing preparation, and putative mechanisms

799 Degeneracies are ubiquitous in biological control (Edel-  
800 man and Gally, 2001; Todorov and Jordan, 2002;  
801 O’Leary et al., 2014; Hennig et al., 2018). In motor con-  
802 trol, movement trajectories are highly degenerate w.r.t.  
803 the goal; e.g. there are very many ways to reach for a cup  
804 of coffee. Todorov and Jordan viewed motor variability  
805 through the lens of stochastic optimal control, arguing  
806 that only those motor fluctuations that interfere with  
807 task goals should be corrected, while other aspects of  
808 the movement can vary freely. Here, we have shown  
809 that principles of optimal control can also explain the  
810 structure of neural variability in M1/PMd during prepa-

811 ration, due to an analogous degeneracy in preparatory  
812 activity. In particular, optimal elimination of prospec-  
813 tive motor errors during preparation predicts suppres-  
814 sion of trial-by-trial variability, which occurs in monkey  
815 M1/PMd (Nawrot et al., 2001; Churchland et al., 2006b;  
816 Rickert et al., 2009; Churchland et al., 2010a) and mouse  
817 ALM (Inagaki et al., 2019). More importantly, variabil-  
818 ity suppression should be coordinated across the popu-  
819 lation in such a way that fluctuations are suppressed  
820 faster along directions that matter more (“potent direc-  
821 tions”). Here, we have successfully verified this novel  
822 prediction in monkey data.

823 In our model, selective quenching of variability arises  
824 from much the same mechanism as we have recently pro-  
825 posed for primary visual cortex (V1; Hennequin et al.,  
826 2018). There, we argued that external stimuli change  
827 the operating point of the network dynamics, and since  
828 these dynamics are nonlinear (Ahmadian et al., 2013;  
829 Rubin et al., 2015), the result is a modification of effec-  
830 tive connectivity. We went on to show that this resulted  
831 in greater inhibitory dominance (as in Stringer et al.,  
832 2016), and therefore to quenching of fluctuations. Here,  
833 variability suppression is also due to increased effective  
834 negative feedback (Section S4.10), but this occurs due  
835 to the sudden addition of a thalamocortical pathway at  
836 preparation onset — as opposed to an exogenous stimu-  
837 lus.

## 838 Outlook

839 To explore the ramifications of optimal control for mo-  
840 tor preparation, we had to commit to a concrete model  
841 of movement-generating dynamics in M1 (Hennequin  
842 et al., 2014). While our model captures several salient  
843 features of movement-related activity (Section S5), as  
844 well as key qualitative aspects of preparatory dynamics,  
845 more quantitative predictions would require detailed,  
846 data-driven modelling of M1 (Pandarinath et al., 2018).  
847 Such future extensions of our control-theoretic frame-  
848 work could help elucidate the role of the numerous brain  
849 areas that collectively control movement (Svoboda and  
850 Li, 2018), and make sense of their hierarchical organi-  
851 zation in nested loops.

## 852 Acknowledgments

853 This work was supported by a Seed Award from the  
854 Wellcome Trust (202111/Z/16/Z), a Trinity-Henry Bar-  
855 low scholarship (T-C.K.), and a scholarship from the  
856 Ministry of Education, ROC Taiwan (T-C.K.). We are  
857 grateful to Mark Churchland, Matthew Kaufman and  
858 Krishna Shenoy for sharing their data and for discus-  
859 sions; to Omri Barak for suggesting an estimation of  
860 potent and null subspaces from data; to Karel Svoboda  
861 and his lab for hospitality and discussions.



## References

- Afshar, A., Santhanam, G., Byron, M. Y., Ryu, S. I., Sahani, M., and Shenoy, K. V. (2011). Single-trial neural correlates of arm movement preparation. *Neuron*, 71:555–564.
- Ahmadian, Y., Rubin, D. B., and Miller, K. D. (2013). Analysis of the stabilized supralinear network. *Neural Comput*, 25:1994–2037.
- Ames, K. C., Ryu, S. I., and Shenoy, K. V. (2014). Neural dynamics of reaching following incorrect or absent motor preparation. *Neuron*, 81:438–451.
- Barak, O. (2017). Recurrent neural networks as versatile tools of neuroscience research. *Curr Opin Neurobiol*, 46:1–6.
- Carnevale, F., de Lafuente, V., Romo, R., Barak, O., and Parga, N. (2015). Dynamic control of response criterion in premotor cortex during perceptual detection under temporal uncertainty. *Neuron*, 86:1067–1077.
- Churchland, M. M., Afshar, A., and Shenoy, K. V. (2006a). A central source of movement variability. *Neuron*, 52:1085–1096.
- Churchland, M. M., Byron, M. Y., Cunningham, J. P., Suggs, L. P., Cohen, M. R., Corrado, G. S., Newsome, W. T., Clark, A. M., Hosseini, P., Scott, B. B., et al. (2010a). Stimulus onset quenches neural variability: a widespread cortical phenomenon. *Nat Neurosci*, 13:369–378.
- Churchland, M. M., Byron, M. Y., Ryu, S. I., Santhanam, G., and Shenoy, K. V. (2006b). Neural variability in premotor cortex provides a signature of motor preparation. *J Neurosci*, 26:3697–3712.
- Churchland, M. M., Cunningham, J. P., Kaufman, M. T., Foster, J. D., Nuyujukian, P., Ryu, S. I., and Shenoy, K. V. (2012). Neural population dynamics during reaching. *Nature*, 487(7405):51.
- Churchland, M. M., Cunningham, J. P., Kaufman, M. T., Ryu, S. I., and Shenoy, K. V. (2010b). Cortical preparatory activity: representation of movement or first cog in a dynamical machine? *Neuron*, 68:387–400.
- Cui, G., Jun, S. B., Jin, X., Pham, M. D., Vogel, S. S., Lovinger, D. M., and Costa, R. M. (2013). Concurrent activation of striatal direct and indirect pathways during action initiation. *Nature*, 494:238–242.
- Cunningham, J. P. and Byron, M. Y. (2014). Dimensionality reduction for large-scale neural recordings. *Nat Neurosci*, 17:1500.
- Dayan, P. and Abbott, L. F. (2001). *Theoretical neuroscience*. Cambridge, MA: MIT Press.
- Desmurget, M. and Grafton, S. (2000). Forward modeling allows feedback control for fast reaching movements. *Trends Cogn Sci*, 4(11):423–431.
- Edelman, G. M. and Gally, J. A. (2001). Degeneracy and complexity in biological systems. *Proc Natl Ac Sci USA*, 98(24):13763–13768.
- Elsayed, G. F., Lara, A. H., Kaufman, M. T., Churchland, M. M., and Cunningham, J. P. (2016). Reorganization between preparatory and movement population responses in motor cortex. *Nat Commun*, 7:13239.
- Evarts, E. V. (1968). Relation of pyramidal tract activity to force exerted during voluntary movement. *J Neurophysiol*, 31:14–27.
- Gao, Z., Davis, C., Thomas, A. M., Economo, M. N., Abrego, A. M., Svoboda, K., De Zeeuw, C. I., and Li, N. (2018). A cortico-cerebellar loop for motor planning. *Nature*, 563:113–116.
- Guo, Z. V., Inagaki, H. K., Daie, K., Druckmann, S., Gersen, C. R., and Svoboda, K. (2017). Maintenance of persistent activity in a frontal thalamocortical loop. *Nature*, 545:181–186.
- Halassa, M. M. and Acsády, L. (2016). Thalamic inhibition: diverse sources, diverse scales. *Trends Neurosci*, 39:680–693.
- Halassa, M. M. and Sherman, S. M. (2019). Thalamocortical circuit motifs: a general framework. *Neuron*, 103:762–770.
- Hennequin, G., Ahmadian, Y., Rubin, D. B., Lengyel, M., and Miller, K. D. (2018). The dynamical regime of sensory cortex: stable dynamics around a single stimulus-tuned attractor account for patterns of noise variability. *Neuron*, 98:846–860.
- Hennequin, G., Vogels, T. P., and Gerstner, W. (2014). Optimal control of transient dynamics in balanced networks supports generation of complex movements. *Neuron*, 82:1394–1406.
- Hennig, J. A., Golub, M. D., Lund, P. J., Sadtler, P. T., Oby, E. R., Quick, K. M., Ryu, S. I., Tyler-Kabara, E. C., Batista, A. P., Byron, M. Y., et al. (2018). Constraints on neural redundancy. *eLife*, 7:e36774.
- Inagaki, H. K., Fontolan, L., Romani, S., and Svoboda, K. (2019). Discrete attractor dynamics underlies persistent activity in the frontal cortex. *Nature*, 566:212–217.
- Jin, X. and Costa, R. M. (2010). Start/stop signals emerge in nigrostriatal circuits during sequence learning. *Nature*, 466:457–462.
- Kao, T.-C. and Hennequin, G. (2019). Neuroscience out of control: control-theoretic perspectives on neural circuit dynamics. *Curr Opin Neurobiol*, 58:122–129.
- Kaufman, M. T., Churchland, M. M., Ryu, S. I., and Shenoy, K. V. (2014). Cortical activity in the null space: permitting preparation without movement. *Nat Neurosci*, 17:440–448.
- Kaufman, M. T., Seely, J. S., Sussillo, D., Ryu, S. I., Shenoy, K. V., and Churchland, M. M. (2016). The Largest Response Component in the Motor Cortex Reflects Movement Timing but Not Movement Type. *eNeuro*, 3(4):0085–16.2016.
- Lara, A. H., Elsayed, G. F., Zimnik, A. J., Cunningham, J. P., and Churchland, M. M. (2018). Conservation of preparatory neural events in monkey motor cortex regardless of how movement is initiated. *eLife*, 7:e31826.

- Li, N., Daie, K., Svoboda, K., and Druckmann, S. (2016). Robust neuronal dynamics in premotor cortex during motor planning. *Nature*, 532(7600):459–464.
- Lillicrap, T. P. and Scott, S. H. (2013). Preference distributions of primary motor cortex neurons reflect control solutions optimized for limb biomechanics. *Neuron*, 77(1):168–179.
- Linderman, S., Johnson, M., Miller, A., Adams, R., Blei, D., and Paninski, L. (2017). Bayesian learning and inference in recurrent switching linear dynamical systems. In *Proceedings of the 20th International Conference on Artificial Intelligence and Statistics*, volume 54, pages 914–922.
- Logiaco, L., Abbott, L. F., and Escola, S. (2019). A model of flexible motor sequencing through thalamic control of cortical dynamics. *bioRxiv*.
- Mante, V., Sussillo, D., Shenoy, K. V., and Newsome, W. T. (2013). Context-dependent computation by recurrent dynamics in prefrontal cortex. *Nature*, 503:78–84.
- Michaels, J. A., Dann, B., and Scherberger, H. (2016). Neural population dynamics during reaching are better explained by a dynamical system than representational tuning. *PLoS Comput Biol*, 12.
- Nakajima, M. and Halassa, M. M. (2017). Thalamic control of functional cortical connectivity. *Curr Opin Neurobiol*, 44:127–131.
- Nawrot, M., Rodriguez, V., Heck, D., Riehle, A., Aertsen, A., and Rotter, S. (2001). Trial-by-trial variability of spike trains in vivo and in vitro. In *Soc Neurosci Abstr*, volume 27.
- O’Leary, T., Williams, A. H., Franci, A., and Marder, E. (2014). Cell types, network homeostasis, and pathological compensation from a biologically plausible ion channel expression model. *Neuron*, 82:809–821.
- Omriani, M., Kaufman, M. T., Hatsopoulos, N. G., and Cheney, P. D. (2017). Perspectives on classical controversies about the motor cortex. *J Neurophysiol*, 118:1828–1848.
- Ozeki, H., Finn, I. M., Schaffer, E. S., Miller, K. D., and Ferster, D. (2009). Inhibitory stabilization of the cortical network underlies visual surround suppression. *Neuron*, 62(4):578–592.
- O’Shea, D. J., Kalanithi, P., Ferenczi, E. A., Hsueh, B., Chandrasekaran, C., Goo, W., Diester, I., Ramakrishnan, C., Kaufman, M. T., Ryu, S. I., et al. (2018). Development of an optogenetic toolkit for neural circuit dissection in squirrel monkeys. *Sci Rep*, 8:1–20.
- Pandarathna, C., O’Shea, D. J., Collins, J., Jozefowicz, R., Stavisky, S. D., Kao, J. C., Trautmann, E. M., Kaufman, M. T., Ryu, S. I., Hochberg, L. R., et al. (2018). Inferring single-trial neural population dynamics using sequential auto-encoders. *Nat Methods*, 15:805–815.
- Remington, E. D., Egger, S. W., Narain, D., Wang, J., and Jazayeri, M. (2018). A dynamical systems perspective on flexible motor timing. *Trends Cogn Sci*, 22:938–952.
- Rickert, J., Riehle, A., Aertsen, A., Rotter, S., and Nawrot, M. P. (2009). Dynamic encoding of movement direction in motor cortical neurons. *J Neurosci*, 29:13870–13882.
- Rikhye, R. V., Gilra, A., and Halassa, M. M. (2018). Thalamic regulation of switching between cortical representations enables cognitive flexibility. *Nat Neurosci*, 21:1753–1763.
- Rubin, D. B., Van Hooser, S. D., and Miller, K. D. (2015). The stabilized supralinear network: a unifying circuit motif underlying multi-input integration in sensory cortex. *Neuron*, 85:402–417.
- Sanzeni, A., Akitake, B., Goldbach, H. C., Leedy, C. E., Brunel, N., and Histed, M. H. (2019). Inhibition stabilization is a widespread property of cortical networks. *bioRxiv*, page 656710.
- Sauerbrei, B. A., Guo, J.-Z., Cohen, J. D., Mischiati, M., Guo, W., Kabra, M., Verma, N., Mensh, B., Branson, K., and Hantman, A. W. (2019). Cortical pattern generation during dexterous movement is input-driven. *Nature*, pages 1–6.
- Scott, S. H. (2012). The computational and neural basis of voluntary motor control and planning. *Trends Cogn Sci*, 16:541–549.
- Scott, S. H., Cluff, T., Lowrey, C. R., and Takei, T. (2015). Feedback control during voluntary motor actions. *Curr Opin Neurobiol*, 33:85–94.
- Seely, J. S., Kaufman, M. T., Ryu, S. I., Shenoy, K. V., Cunningham, J. P., and Churchland, M. M. (2016). Tensor analysis reveals distinct population structure that parallels the different computational roles of areas m1 and v1. *PLoS Comput Biol*, 12.
- Sheahan, H. R., Franklin, D. W., and Wolpert, D. M. (2016). Motor planning, not execution, separates motor memories. *Neuron*, 92:773–779.
- Shenoy, K. V., Sahani, M., and Churchland, M. M. (2013). Cortical control of arm movements: a dynamical systems perspective. *Ann. Rev. Neurosci.*, 36:337–359.
- Skogestad, S. and Postlethwaite, I. (2007). *Multivariable feedback control: analysis and design*, volume 2. Wiley New York.
- Sohn, H., Narain, D., Meirhaeghe, N., and Jazayeri, M. (2019). Bayesian computation through cortical latent dynamics. *Neuron*, 103:934–947.
- Stringer, C., Pachitariu, M., Steinmetz, N. A., Okun, M., Barthelemy, P., Harris, K. D., Sahani, M., and Lesica, N. A. (2016). Inhibitory control of correlated intrinsic variability in cortical networks. *eLife*, 5:e19695.
- Stroud, J. P., Porter, M. A., Hennequin, G., and Vogels, T. P. (2018). Motor primitives in space and time via targeted gain modulation in cortical networks. *Nat Neurosci*, 21(12):1774–1783.
- Sussillo, D. and Abbott, L. F. (2009). Generating coherent patterns of activity from chaotic neural networks. *Neuron*, 63:544–557.
- Sussillo, D., Churchland, M. M., Kaufman, M. T., and Shenoy, K. V. (2015). A neural network that finds a naturalistic solution for the production of muscle activity. *Nat Neurosci*, 18:1025–1033.

- Svoboda, K. and Li, N. (2018). Neural mechanisms of movement planning: motor cortex and beyond. *Curr Opin Neurobiol*, 49:33–41.
- Todorov, E. (2000). Direct cortical control of muscle activation in voluntary arm movements: a model. *Nat Neurosci*, 3:391–398.
- Todorov, E. and Jordan, M. I. (2002). Optimal feedback control as a theory of motor coordination. *Nat Neurosci*, 5(11):1226–1235.
- Trefethen, L. N. and Embree, M. (2005). *Spectra and pseudospectra: the behavior of nonnormal matrices and operators*. Princeton University Press.
- Tsodyks, M. V., Skaggs, W. E., Sejnowski, T. J., and McNaughton, B. L. (1997). Paradoxical effects of external modulation of inhibitory interneurons. *J Neurosci*, 17(11):4382–4388.
- Wolpert, D. M., Ghahramani, Z., and Jordan, M. I. (1995). An internal model for sensorimotor integration. *Science*, 269:1880–1882.
