# Supplementary material for: Optimal anticipatory control as a theory of motor preparation: a thalamo-cortical circuit model
Source: bioRxiv or medRxiv preprint supplement (doi:10.1101/2020.02.02.931246), 2021-01-19
Supplement: Supplementary file [file media-1.pdf]

# Optimal anticipatory control of movement as a theory of motor preparation: a thalamo-cortical circuit model

Ta-Chu Kao<sup>1</sup>, Mahdieh S. Sadabadi<sup>1,2</sup>, and Guillaume Hennequin<sup>@1</sup>

<sup>1</sup>Computational and Biological Learning Lab, Department of Engineering, University of Cambridge,  
Cambridge, U.K.

<sup>2</sup>Department of Automatic Control and Systems Engineering, University of Sheffield, Sheffield, U.K.

@ Corresponding author (g.hennequin@eng.cam.ac.uk)

## SUPPLEMENTARY MATERIAL

### Contents

|                                                                                    |           |
|------------------------------------------------------------------------------------|-----------|
| <b>S1 Overview of this document</b>                                                | <b>2</b>  |
| <b>S2 A model for movement generation by cortical dynamics</b>                     | <b>2</b>  |
| S2.1 Network dynamics . . . . .                                                    | 2         |
| S2.2 Arm model . . . . .                                                           | 3         |
| S2.3 Target hand trajectories. . . . .                                             | 3         |
| <b>S3 Formalization of anticipatory motor control</b>                              | <b>4</b>  |
| <b>S4 Optimal control solutions and associated circuits</b>                        | <b>7</b>  |
| S4.1 Naive solution. . . . .                                                       | 7         |
| S4.2 Classical LQR solution . . . . .                                              | 7         |
| S4.3 Control geometry of the ISN model of M1 dynamics . . . . .                    | 8         |
| S4.4 Optimality under neural constraints . . . . .                                 | 9         |
| S4.5 Feedback based on excitatory neurons only . . . . .                           | 9         |
| S4.6 Dale’s law . . . . .                                                          | 10        |
| S4.7 Taking into account integration dynamics in thalamus and M1-layer 4 . . . . . | 11        |
| S4.8 Disinhibitory action of the basal ganglia . . . . .                           | 12        |
| S4.9 Modelling the effect of photoinhibition . . . . .                             | 13        |
| S4.10 Variability quenching. . . . .                                               | 13        |
| <b>S5 Data analysis and comparison with model</b>                                  | <b>14</b> |
| S5.1 Task and neural recordings . . . . .                                          | 14        |
| S5.2 Overlap between preparatory end-states . . . . .                              | 15        |
| S5.3 jPCA . . . . .                                                                | 15        |
| S5.4 Alignment index. . . . .                                                      | 16        |
| S5.5 Canonical-correlation analysis . . . . .                                      | 16        |
| S5.6 Trial-by-trial variability . . . . .                                          | 17        |

## S1 Overview of this document

This document provides details for the theory presented at a high level in the main text, as well as details of the methods used for data analysis. In [Section S2](#), we begin by describing our model of movement generation, including our model of M1 dynamics and that of the two-link arm. In [Section S3](#), we present our formalization of optimal preparatory control and how it relates to the “optimal subspace hypothesis” of [Shenoy et al. \(2013\)](#). In [Section S4](#), we then apply optimal feedback control theory to this problem, and present the steps taken to build a circuit implementation taking into account relevant neural constraints. In [Section S5](#), we give an in-depth description of the methods used for analyzing the monkey data.

The parameters used in our simulations are all listed in [Table S1](#).

## S2 A model for movement generation by cortical dynamics

### S2.1 Network dynamics

We model M1 as a network with two separate populations of  $N_E = 160$  excitatory (E) neurons and  $N_I = 40$  inhibitory (I) neurons, operating in the inhibition-stabilized regime ([Tsodyks et al., 1997](#); [Ozeki et al., 2009](#); [Hennequin et al., 2014](#)). We constructed its synaptic architecture exactly as we have shown previously in [Hennequin et al. \(2014\)](#). We describe the dynamics of these  $N = N_E + N_I$  neurons by a standard nonlinear rate equation. Specifically, the vector  $\mathbf{x}(t) = (\mathbf{x}_E(t)^T, \mathbf{x}_I(t)^T)^T$  of internal neuronal “activations” obeys:

$$\tau \frac{d\mathbf{x}}{dt} = -\mathbf{x}(t) + \mathbf{W}\phi[\mathbf{x}(t)] + \bar{\mathbf{h}} + \mathbf{h}(t) + \mathbf{u}(t) \quad (\text{S1})$$

where  $\tau$  is the single-neuron time constant,  $\mathbf{W}$  is the synaptic connectivity matrix, and  $\phi(x) = \max(x, 0)$  is a static, rectified-linear nonlinearity – applied elementwise to  $\mathbf{x}$  – that converts internal activation into momentary firing rates. The input consist of three terms: an input  $\bar{\mathbf{h}} = \mathbf{x}_{\text{sp}} - \mathbf{W}\phi[\mathbf{x}_{\text{sp}}]$  held constant throughout all phases of the task to instate a heterogeneous set of spontaneous firing rates  $\mathbf{x}_{\text{sp}}$  (elements drawn i.i.d. from  $\mathcal{N}(20, 9)$ ); a transient, movement-condition-independent and spatially uniform  $\alpha$ -shaped input bump

$$\mathbf{h}(t) = (1, \dots, 1)^T \times \begin{cases} \text{if } t > t_{\text{move}} : & A \left[ \exp\left(-\frac{t-t_{\text{move}}}{\tau_{\text{decay}}}\right) - \exp\left(-\frac{t-t_{\text{move}}}{\tau_{\text{rise}}}\right) \right] \\ \text{otherwise:} & 0 \end{cases} \quad (\text{S2})$$

kicking in at movement onset ([Kaufman et al., 2016](#)); and a preparatory control input  $\mathbf{u}(t)$  (further specified below) whose role is to drive the circuit into a preparatory state appropriate for each movement.

We assume that the uncontrolled dynamics ( $\mathbf{u} = \mathbf{0}$ ) of this network directly drives movement. A two-dimensional linear readout of the excitatory neurons,

$$\mathbf{m}(t) = \mathbf{C}\phi[\mathbf{x}_E(t)] \quad (\text{S3})$$

with  $\mathbf{C} \in \mathbb{R}^{2 \times N_E}$ , is used as a set of torques to actuate the two-link arm model described in the next section. Although our simulations show that the muscle readouts  $\mathbf{m}(t)$  are very small during preparation, they do cause drift in the hand prior to movement onset (and therefore wrong movements afterwards) as their are effectively integrated twice by the dynamics of the arm (see below). For this reason, we artificially set  $\mathbf{m}$  to zero during movement preparation.

## 35 S2.2 Arm model

36 To simulate reaching movements, we used the planar two-link arm model previously described  
 37 in [Li and Todorov \(2004\)](#), with parameters listed in [Table S1](#). The upper arm and the lower arm  
 38 are connected at the elbow ([Figure S1](#)). The two links have lengths  $L_1$  and  $L_2$ , masses  $M_1$  and  
 39  $M_2$ , and moments of inertia  $I_1$  and  $I_2$  respectively. The lower arm’s center of mass is located a  
 40 distance  $D_2$  from the elbow. By considering the geometry of the upper and lower limb, we can  
 41 write down the position of the hand as a vector  $\mathbf{y}(t)$  given by

$$\mathbf{y} = \begin{pmatrix} L_1 \cos \theta_1 + L_2 \cos(\theta_1 + \theta_2) \\ L_1 \sin \theta_1 + L_2 \sin(\theta_1 + \theta_2) \end{pmatrix} \quad (\text{S4})$$

42 where the angles  $\theta_1$  and  $\theta_2$  are defined in [Figure S1A](#). The joint angles  $\boldsymbol{\theta} = (\theta_1; \theta_2)^T$  evolve  
 43 dynamically according to the differential equation

$$\mathbf{m}(t) = \mathcal{M}(\boldsymbol{\theta})\ddot{\boldsymbol{\theta}} + \mathcal{X}(\boldsymbol{\theta}, \dot{\boldsymbol{\theta}}) + \mathcal{B}\dot{\boldsymbol{\theta}}, \quad (\text{S5})$$

44 where  $\mathbf{m}(t)$  is the momentary torque vector (the output of the neural network, c.f. [Equation S3](#)),  
 45  $\mathcal{M}$  is the matrix of inertia,  $\mathcal{X}$  accounts for the centripetal and Coriolis forces, and  $\mathcal{B}$  is a damping  
 46 matrix representing joint friction. These parameters are given by

$$\mathcal{M}(\boldsymbol{\theta}) = \begin{pmatrix} a_1 + 2a_2 \cos \theta_2 & a_3 + a_2 \cos \theta_2 \\ a_3 + a_2 \cos \theta_2 & a_3 \end{pmatrix} \quad (\text{S6})$$

$$\mathcal{X}(\boldsymbol{\theta}, \dot{\boldsymbol{\theta}}) = a_2 \sin \theta_2 \begin{pmatrix} -\dot{\theta}_2(2\dot{\theta}_1 + \dot{\theta}_2) \\ \dot{\theta}_1^2 \end{pmatrix} \quad \mathcal{B} = \begin{pmatrix} 0.05 & 0.025 \\ 0.025 & 0.05 \end{pmatrix} \quad (\text{S7})$$

48 with  $a_1 = I_1 + I_2 + M_2 L_1^2$ ,  $a_2 = M_2 L_1 D_2$ , and  $a_3 = I_2$ .

## 49 S2.3 Target hand trajectories

50 We generated a set of eight target hand trajectories, namely straight reaches of size  $d = 20$  cm  
 51 going from the origin into eight different directions, with a common bell-shaped scalar speed  
 52 profile

$$v(t) = v_0 \left( \frac{t}{\tau_{\text{reach}}} \right)^2 \exp \left[ -\frac{1}{2} \left( \frac{t}{\tau_{\text{reach}}} \right)^2 \right], \quad (\text{S8})$$

53 where  $v_0$  is chosen such that the hand reaches the target. Given these target hand trajecto-  
 54 ries, we solved for the required timecourse of the torque vector  $\mathbf{m}(t)$  through optimization, by  
 55 backpropagating through the equations of motion of the arm to minimize the squared difference  
 56 between actual and desired hand trajectories. We forced the initial torques at  $t = 0$  to be zero,  
 57 and also included a roughness penalty in the form of average squared torque gradient.

58 Similarly, we then backpropagated through the equations of the recurrent neural network ([Equa-  
 59 tions S1 and S3](#)) to optimize a set of eight movement-specific initial conditions  $\{\mathbf{x}_k^*\}$ ,  $k = 1, \dots, 8$ ,  
 60 as well as the readout matrix  $\mathbf{C}$ , so as to achieve the desired torques in the output. This was  
 61 done by minimizing the squared difference between actual and desired torque trajectories, with  
 62 a penalty on  $\mathbf{C}$ ’s squared Frobenius norm.

63 We parameterized the readout matrix  $\mathbf{C}$  in such a way that its nullspace automatically contains  
 64 both the spontaneous activity vector  $\mathbf{x}_{\text{sp}}$  and the movement-specific initial conditions  $\{\mathbf{x}_k^*\}$ ,  
 65  $k = 1, \dots, 8$ . This is to ensure that (i) there is no muscle output during spontaneous activity  
 66 and (ii) the network does not unduly generate muscle output at the end of preparation, before

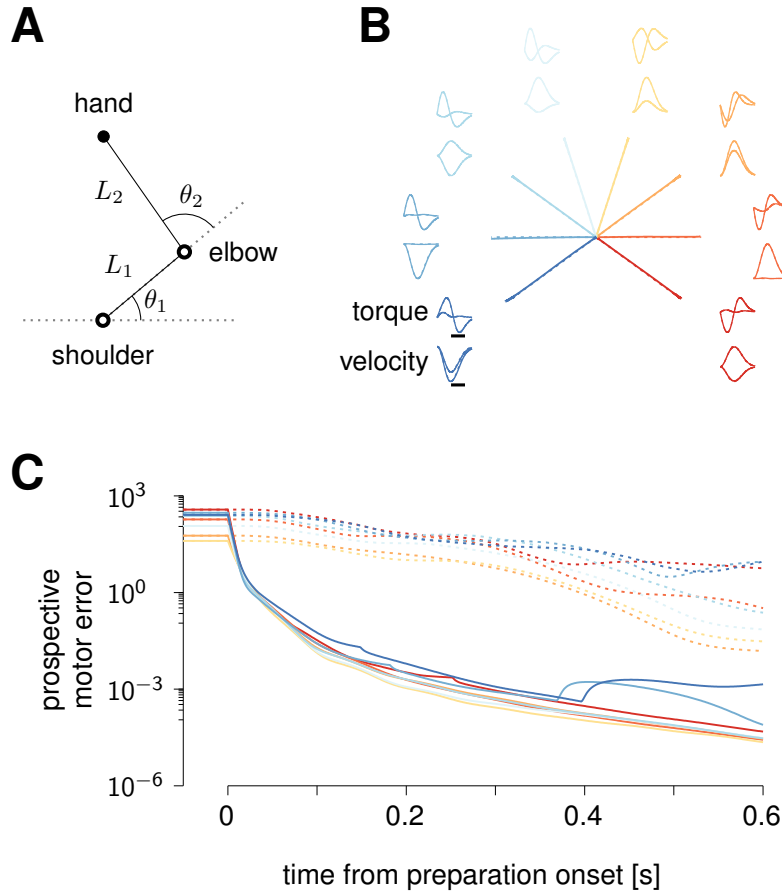

Figure S1: **(A)** Schematics of the arm model (see supplementary text). **(B)** Reaches produced by the model, along with associated torques at the two joints, and x-y velocities of the hand (solid lines). Scale bar: 200 ms. Dashed lines denote target trajectories. **(C)** Decay of the prospective motor cost during movement preparation, under optimal feedback control (solid lines, same color code for the movements as in B), and under a naive policy with temporally constant input that achieves a movement-specific fixed point ( $\mathbf{x}_k^*$ ) with zero motor error, asymptotically (dashed lines).

67 movement. More specifically, prior to movement preparation and long enough after movement  
68 execution, the cortical state is in spontaneous activity  $\mathbf{x}_{\text{sp}}$ . By ensuring that  $\mathbf{C}\mathbf{x}_{\text{sp}} = \mathbf{0}$ , we  
69 ensure that our model network does not elicit movement “spontaneously”. Similarly, control  
70 inputs drive the cortical state  $\mathbf{x}$  towards  $\mathbf{x}_k^*$ , which it will eventually reach late in the preparation  
71 epoch. Therefore, if  $\mathbf{x}_k^*$  is not in the null-space of  $\mathbf{C}$ , it would be difficult—if not impossible—for  
72 muscle readout to remain small or event silent during preparation.

### 73 S3 Formalization of anticipatory motor control

74 Here, we address the problem of controlling the state of the cortical network *in anticipation*  
75 of the movement phase, which is to occur in open-loop following the go cue or trigger. That  
76 is to say, we aim at driving the network into preparatory states from which the uncontrolled  
77 dynamics would generate the desired muscle output.

78 We formalise the notion of anticipatory control by asking: given an intended movement (indexed  
79 by  $k$ ), and the current (preparatory) state  $\mathbf{x}(t)$  of the network, how accurate would the movement

80 be if it were to begin *now*? We measure this prospective motor error as the squared difference  
81  $\mathcal{C}_k(\mathbf{x})$  between the subsequent timecourse of the target network output torques  $\mathbf{m}_k^*(t')$  ( $t' > t$ ),  
82 and that of the torques  $\mathbf{m}(t')$  that the network would generate (Equations S1 and S3) if left  
83 *uncontrolled* from time  $t$  onwards, starting from initial condition  $\mathbf{x}(t)$ :

$$\mathcal{C}_k(\mathbf{x}) \triangleq \int_t^\infty \|\mathbf{m}(t') - \mathbf{m}_k^*(t')\|^2 dt' \quad \text{with} \quad \mathbf{u}(t' \geq t) = 0 \quad (\text{S9})$$

84 (we will often drop the explicit reference to the movement index  $k$  to remove clutter, as we did  
85 in the main text). Thus, any preparatory state  $\mathbf{x}$  is associated with a prospective motor error  
86  $\mathcal{C}(\mathbf{x})$ .

87 The prospective error  $\mathcal{C}(\mathbf{x})$  changes dynamically during movement preparation, as  $\mathbf{x}(t)$  evolves  
88 under the action of control inputs. The aim of the control inputs is to rapidly decrease this  
89 prospective error, until it drops below an acceptably small threshold, or until movement initiation  
90 is forced. We formalize this as the minimization of the following control cost:

$$\mathcal{J}[\mathbf{u}(t)] \triangleq \left\langle \int_0^\infty (\mathcal{C}(\mathbf{x}(t)) + \lambda \mathcal{R}(\mathbf{u}(t))) dt \right\rangle_{p(\mathbf{x}(t=0))} \quad (\text{S10})$$

91 where  $\mathcal{R}(\mathbf{u})$  is a regularizer described below, and the average is over some distribution of states  
92 we expect the network to be found in at the time the controlled preparatory phase begins (we  
93 leave this unspecified for now as it turns out not to influence the optimal control strategy –  
94 see below). Thus, we want control inputs to rapidly steer the cortical network into states of  
95 low  $\mathcal{C}(\mathbf{x})$  from which the movement can be readily executed. The infinite-horizon summation  
96 expresses uncertainty about how long movement preparation will last, and indeed encourages  
97 the network to be “ready” as soon as possible.

98 Mathematically,  $\mathcal{J}[\cdot]$  is a functional of the spatio-temporal pattern of control input  $\mathbf{u}(t)$  —  
99 indeed,  $\mathbf{x}(t)$  depends on  $\mathbf{u}(t)$  through Equation S1. The regularizer  $\mathcal{R}(\mathbf{u})$ , or “control effort”,  
100 is specified further below. Without regularization, the problem is ill-posed, as arbitrarily large  
101 control inputs could be used to instantaneously force the network into the right preparatory  
102 state in theory, leading to physically infeasible control solutions in practice. Also note that  
103 Equation S10 is an “infinite-horizon” cost, i.e. the integral runs from the beginning of movement  
104 preparation when control inputs kick in, until infinity. This does *not* mean, however, that the  
105 preparation phase must be infinitely long. In fact, good control inputs should (and will!) bring  
106 the integrand close to zero very fast, such that the movement is ready to begin after only a short  
107 preparatory phase (see e.g. Figure 2A in the main text).

108 In order to derive the optimal control law, we further assume that the dynamics of the network  
109 remain approximately linear during both movement preparation and execution. This holds  
110 approximately true as long as only few neurons become silent in either phase (the saturation  
111 at zero firing rate is the only source of nonlinearity in our model, c.f.  $\phi(\cdot)$  in Equation S1). In  
112 this case, the prospective motor error  $\mathcal{C}(\mathbf{x})$  of Equation S9 affords a simpler, interpretable form,  
113 which we derive now. In the linear regime, Equation S1 becomes

$$\tau \frac{d\mathbf{x}}{dt} = \mathbf{A}\mathbf{x}(t) + \bar{\mathbf{h}} + \mathbf{h}(t) + \mathbf{u}(t) \quad (\text{S11})$$

114 with an effective state transition matrix  $\mathbf{A} \triangleq \mathbf{W} - \mathbf{I}$ . The network output at time  $t$ , starting  
115 from state  $\mathbf{x}$  at time  $t = 0$  and with no control input thereafter, has an analytical form given by

$$\mathbf{m}(t) = \mathbf{C} \left[ e^{(t/\tau)\mathbf{A}} (\mathbf{x} - \mathbf{x}_{\text{sp}}) + \mathbf{q}(t) \right] \quad (\text{S12})$$

117 and similarly for  $\mathbf{m}^*(t)$  with  $\mathbf{x}$  replaced by  $\mathbf{x}^*$ . The final term  $\mathbf{q}(t)$  is a contribution from the  
118 external input: it does not depend on the initial condition, and is therefore the same in both

119 cases. Thus, the prospective motor error (Equation S9) attached to preparatory state  $\mathbf{x}$  is given  
 120 by

$$\mathcal{C}(\mathbf{x}) = \int_0^\infty \|\mathbf{C}e^{(t/\tau)\mathbf{A}}(\mathbf{x} - \mathbf{x}^*)\|^2 dt = (\mathbf{x} - \mathbf{x}^*)^T \underbrace{\left[ \int_0^\infty \left( e^{(t/\tau)\mathbf{A}^T} \mathbf{C}^T \mathbf{C} e^{(t/\tau)\mathbf{A}} \right) dt \right]}_{\mathbf{Q}} (\mathbf{x} - \mathbf{x}^*). \quad (\text{S13})$$

121 The matrix integral on the r.h.s. of Equation S13 is known as the “observability Gramian”  $\mathbf{Q}$   
 122 of the pair  $(\mathbf{A}, \mathbf{C})$  (Skogestad and Postlethwaite, 2007; Kao and Hennequin, 2019). It is found  
 123 algebraically as the solution of the Lyapunov equation (Lemma 1 in Appendix A)

$$\mathbf{A}^T \mathbf{Q} + \mathbf{Q} \mathbf{A} + \tau \mathbf{C}^T \mathbf{C} = 0 \quad (\text{S14})$$

124 Thus, under linearity assumptions, the prospective motor error is a quadratic function of the  
 125 difference between the momentary preparatory state and the optimal initial state  $\mathbf{x}^*$  known to  
 126 elicit the right muscle outputs in open loop. The Gramian  $\mathbf{Q}$ , a symmetric, positive-definite  
 127 matrix, determines how preparatory deviations away from  $\mathbf{x}^*$  give rise to subsequent motor  
 128 errors. Deviations along the few eigenmodes of  $\mathbf{Q}$  associated with large eigenvalues will lead to  
 129 large errors in muscle outputs. The optimal control input  $\mathbf{u}(t)$  will need to work hard to minimize  
 130 this type of deviations – luckily, there are only few of them (Figure S3, top left; see also Figure 4 in  
 131 the main text). In contrast, errors occurring along eigenmodes of  $\mathbf{Q}$  with small eigenvalues – the  
 132 vast majority – have almost no motor consequences. This large bottom subspace of  $\mathbf{Q}$  provides a  
 133 safe buffer in which preparatory activity is allowed to fluctuate without sacrificing control quality.  
 134 It comprises both the “readout-null” and “dynamic-null” directions described in the main text  
 135 (Figure 1D). Geometrically, we can therefore think of the optimal preparatory subspace as a  
 136 high-dimensional ellipsoid centered on  $\mathbf{x}^*$ , and whose small and (potentially infinitely) large axes  
 137 are given by the top and bottom eigenvectors of  $\mathbf{Q}$ , respectively (small axes, steep directions,  
 138 large eigenvalues; long axes, flat directions, small eigenvalues).

139 To quantify these geometric insights, we define a measure of motor potency for a subspace  $\mathbf{S}$   
 140 spanned by orthonormal column vectors  $(\mathbf{d}_1, \mathbf{d}_2, \dots, \mathbf{d}_K)$  as

$$\text{motor potency}(\mathbf{S}) = \frac{1}{K} \sum_{i=1}^K \mathbf{d}_i^T \mathbf{Q} \mathbf{d}_i. \quad (\text{S15})$$

141 This quantifies the amount of prospective motor error induced on average when the state of the  
 142 network deviates from  $\mathbf{x}^*$  in  $\mathbf{S}$ . This is what we showed in Figure 4.

143 Finally, we note that the optimal control input  $\mathbf{u}(t)$  must keep the infinite-horizon integral in  
 144 Equation S10 finite. This requires  $\mathbf{x}(t)$  to reach a fixed point equal to  $\mathbf{x}^*$ , which in turn requires  
 145 the control input to eventually settle to a steady-state value equal to

$$\mathbf{u}^* = -\mathbf{A}\mathbf{x}^* - \mathbf{h} \quad (\text{S16})$$

146 Thus, defining  $\delta\mathbf{u}(t) \triangleq \mathbf{u}(t) - \mathbf{u}^*$  and  $\delta\mathbf{x}(t) \triangleq \mathbf{x}(t) - \mathbf{x}^*$ , a relevant regularizer for our control  
 147 problem is

$$\mathcal{R}(\mathbf{u}(t)) \triangleq \|\delta\mathbf{u}(t)\|^2 \quad (\text{S17})$$

148 and our control cost functional becomes

$$\mathcal{J}[\mathbf{u}(t)] = \left\langle \int_0^\infty [\delta\mathbf{x}(t)^T \mathbf{Q} \delta\mathbf{x}(t) + \lambda \|\delta\mathbf{u}(t)\|^2] dt \right\rangle_{p(\mathbf{x}(t=0))}. \quad (\text{S18})$$

149 In our simulations, we perform a simple scalar normalization of  $\mathbf{Q}$  so that  $\text{trace}(\mathbf{Q}) = N$ .  
 150 This makes the first term of the cost more easily comparable to the energy penalty  $\lambda\|\delta\mathbf{u}\|^2$ ,  
 151 which also scales with  $N$ . In the next section, we show that the quadratic formulation of  
 152  $\mathcal{C}(\mathbf{x})$  in Equation S17 leads to analytically tractable optimization of our cost functional  $\mathcal{J}$  in  
 153 Equation S10. We will continue to assume linear network dynamics in order to derive optimal  
 154 control laws, but we will always implement these solutions in the fully nonlinear circuit.

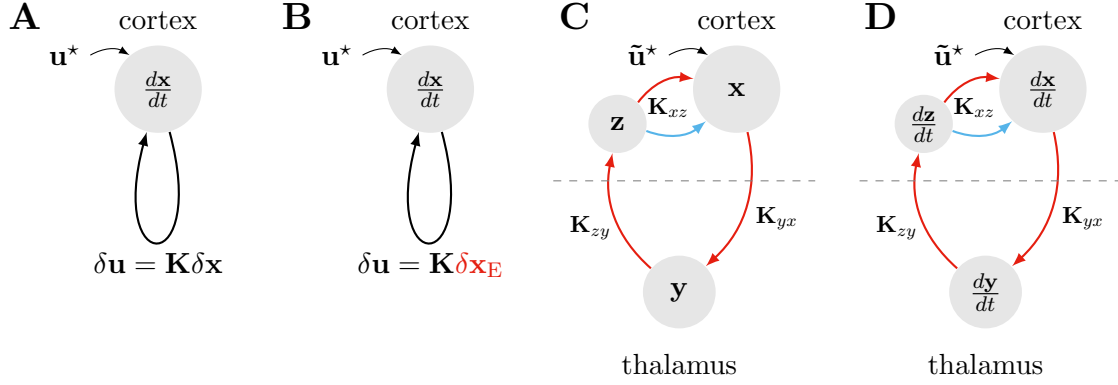

Figure S2: Four steps to arrive at a biologically plausible implementation of optimal anticipatory motor control. **(A)** The classical LQR solution prescribes instantaneous state feedback, with reentrant control inputs of the form of  $\delta \mathbf{u}(t) = \mathbf{K} \delta \mathbf{x}(t)$  and a constant external input  $\mathbf{u}^*$ . [Section S4.2](#) shows how to obtain the optimal feedback matrix  $\mathbf{K}$  in this case. **(B)** It is possible to constrain feedback to be of the form  $\delta \mathbf{u}(t) = \mathbf{K} [\mathbf{I}_{N_E} \mathbf{0}_{N_i}] \delta \mathbf{x}(t) = \mathbf{K} \delta \mathbf{x}_E(t)$  instead. [Section S4.5](#) shows how to obtain the optimal feedback matrix  $\mathbf{K}$  in this case. **(C)** For flexibility, we propose that feedback be relayed by the motor thalamus, which is under the gating control of the basal ganglia. In [Section S4.6](#), we show that the optimal feedback gain  $\mathbf{K}$  obtained in (B) can be decomposed into sign-constrained matrices implementing E connections from M1 to thalamus ( $\mathbf{K}_{yx}$ ), from thalamus to M1-layer 4 ( $\mathbf{K}_{zy}$ ), and Dale-structured E/I connections from layer 4 back into the main recurrent M1 circuit ( $\mathbf{K}_{xz}$ ). **(D)** Finally, first-order dynamics can be introduced in our model thalamus and M1-layer 4 neurons. We show in [Section S4.7](#) how the lag introduced by such dynamics can be taken into account, to obtain a set of connections that achieve optimal anticipatory control of movement under these biological constraints.

## 155 S4 Optimal control solutions and associated circuits

### 156 S4.1 Naive solution

157 A straightforward solution exists for ensuring that, after enough preparation time,  $\mathbf{x}(t)$  converges  
 158 exponentially to  $\mathbf{x}^*$  – thus *eventually* leading to the correct movement. This “naive” solution  
 159 consists in setting  $\mathbf{u}(t)$  to the constant vector  $\mathbf{u}^*$  in [Equation S16](#) (thus  $\delta \mathbf{u}(t) = 0$  throughout  
 160 preparation). Note that for the full nonlinear model,  $\mathbf{u}^* = \mathbf{x}^* - \mathbf{W} \phi[\mathbf{x}^*] - \bar{\mathbf{h}}$ . This constant  
 161 input is provided during movement preparation and removed at the desired time of movement  
 162 onset.

### 163 S4.2 Classical LQR solution

164 When no specific constraints on  $\mathbf{u}(t)$  are imposed, the minimization of [Equation S18](#) is given by  
 165 the celebrated linear quadratic regulator (LQR). Specifically, the optimal control input  $\mathbf{u}_{\text{opt}}(t) =$   
 166  $\mathbf{u}^* + \delta \mathbf{u}_{\text{opt}}(t)$  takes the form of (instantaneous) linear state feedback ([Figure S2A](#)):

$$\delta \mathbf{u}^{\text{opt}}(t) = \mathbf{K} \delta \mathbf{x}(t) \quad \text{with} \quad \mathbf{K} = -\lambda^{-1} \mathbf{P} \quad (\text{S19})$$

167 where  $\mathbf{P}$  is a symmetric, positive definite matrix, obtained as the solution to the following Riccati  
 168 equation:

$$\mathbf{A}^T \mathbf{P} + \mathbf{P} \mathbf{A} - \lambda^{-1} \mathbf{P} \mathbf{P} + \mathbf{Q} = 0 \quad (\text{S20})$$

169 (we will recover this optimal feedback law in [Section S4.5](#) as part of a more general mathematical  
 170 derivation; for now, we refer to standard texts, e.g. [Skogestad and Postlethwaite, 2007](#)). Thus,



171 to achieve optimal anticipatory control of fast movements, the best strategy for the preparatory  
172 phase is to feed back into the circuit a linearly weighted version of the momentary error signal  
173  $\delta\mathbf{x}(t)$ . The optimal feedback matrix  $\mathbf{K}$  turns out to not depend on the choice of distribution  
174  $p(\mathbf{x}(t = 0))$ . For a linear model, this also implies that  $\mathbf{K}$  does not depend on the specific  
175 movement to be performed, i.e. on the specific state  $\mathbf{x}^*$  to be approached during preparation.  
176 Only the steady-state control input  $\mathbf{u}^*$  (in Equation S16) is movement-specific.

### 177 S4.3 Control geometry of the ISN model of M1 dynamics

178 While the optimal LQR strategy described above is difficult to map directly onto a realistic  
179 circuit architecture (see below), it can be used to expose the challenges associated with con-  
180 trolling the inhibition-stabilized model of M1 that we use here. Indeed, network activity may  
181 be more easily controlled (or “steered”) along some directions than along others, and having  
182 analytical access to the optimal control inputs (Equations S19 and S20) allows us to quantify  
183 this “control geometry”. Specifically, we quantify control performance as  $\mathcal{E} = \int_0^\infty (\delta\mathbf{x}^T \mathbf{Q} \delta\mathbf{x}) dt$ ,  
184 i.e. our original cost functional  $\mathcal{J}$  in Equation S10 without the input energy penalty. We can  
185 then ask: what is the smallest such cost  $\mathcal{E}_{\min}$  that can be achieved with a fixed input energy  
186 budget  $\int_0^\infty \|\delta\mathbf{u}\|^2 dt$ ? We know that  $\mathcal{E}_{\min}$  is achieved by the LQR solution  $\delta\mathbf{u} = \lambda^{-1} \mathbf{P}_\lambda$  (we use  
187 the  $\cdot_\lambda$  subscript to make the dependence of  $\mathbf{P}$  on  $\lambda$  explicit). It can be shown that the input  
188 energy induced by this optimal feedback law is a decreasing function of  $\lambda$ . Thus, all we need  
189 to do is find the  $\lambda$  that gives us the desired value of  $\int_0^\infty \|\delta\mathbf{u}\|^2 dt$ , and evaluate  $\mathcal{E}_{\min}$  for this  
190 particular  $\lambda$ . Importantly, the result will depend on the state of the cortical network at the  
191 beginning of the controlled preparatory phase, relative to the target  $\mathbf{x}^*$ .

192 A simple derivation based on Lemma 1 (Appendix A) shows that starting the control phase from  
193 some initial condition  $\mathbf{x}^* + \delta\mathbf{x}_0$  yields a total control cost equal to  $\mathcal{J} = \delta\mathbf{x}_0^T \mathbf{P}_\lambda \delta\mathbf{x}_0$ . Moreover,  
194 the corresponding energy cost is given by  $\delta\mathbf{x}_0^T \mathbf{Y} \delta\mathbf{x}_0$  where  $\mathbf{Y}$  is the solution to

$$\mathbf{A}_{\text{cl}}^T \mathbf{Y} + \mathbf{Y} \mathbf{A}_{\text{cl}} + \lambda^{-2} \mathbf{P}_\lambda \mathbf{P}_\lambda = 0, \quad (\text{S21})$$

195 and

$$\mathbf{A}_{\text{cl}} \triangleq \mathbf{A} + \mathbf{K} = \mathbf{A} - \lambda^{-1} \mathbf{P}_\lambda \quad (\text{S22})$$

196 is the effective state matrix governing the dynamics of the closed control loop. For a given  
197  $\delta\mathbf{x}_0$ , we use a simple root-finding method (bisection with initial interval bracketting) to find  
198 the  $\lambda$  that achieves the set, desired energy cost (our fixed “energy budget”). For this  $\lambda$ , we  
199 then calculate the associated control cost  $\mathcal{E} = \delta\mathbf{x}_0^T (\mathbf{P} - \lambda \mathbf{Y}) \delta\mathbf{x}_0$ . This is plotted in Figure S3,  
200 for initial deviations of  $\mathbf{x}$  from  $\mathbf{x}^*$  chosen to be the top 20 eigenvectors of  $\mathbf{Q}$ , ranked by their  
201 respective eigenvalues  $\nu_i$  (Equation S13).

202 Figure S3 (right) shows that there is “no free lunch”: preparatory deviations from  $\mathbf{x}^*$  that induce  
203 the worst motor errors (the top eigenvectors of  $\mathbf{Q}$ , with the largest eigenvalues  $\nu_i$ ) are also those  
204 that are the most difficult to control, i.e. for which the minimal control cost  $\mathcal{E}_{\min}$  will be largest  
205 for a fixed input energy budget.

206 From the point of view of dynamical systems, this result is rather intuitive. The optimal initial  
207 conditions  $\{\mathbf{x}_k^*\}$  (found via optimization to achieve the required torques; Section S2) are posi-  
208 tioned in state space where the flow induced by the recurrent connectivity is strong – strong  
209 enough to elicit rich transients that can be decoded into torques patterns that grow transiently  
210 before decaying. To steer M1 towards (and maintain it at) these states, the input  $\delta\mathbf{u}(t)$  (and  
211 the steady input  $\mathbf{u}^*$ ) must work against the strong local flow of the recurrent dynamics. This  
212 requires large input energy. From a physiological standpoint, this is also intuitive. The optimal  
213 initial states  $\{\mathbf{x}_k^*\}$  are shown to be states in which the E/I balance is momentarily broken (Hen-



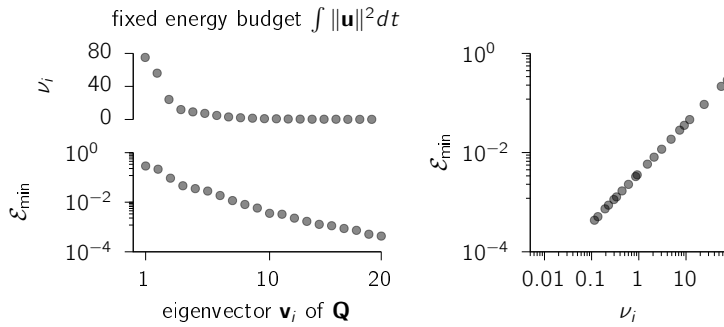

Figure S3: **Left:** eigenvalues  $\nu_i$  (top) and minimum control cost  $\mathcal{E}_{\min}$  achievable given a fixed energy budget (see text), for the top 20 eigenvectors of the observability Gramian  $\mathbf{Q}$  defined in Equation S13. Note that  $\nu_i$  is also the motor error  $\mathcal{C}$  experienced if the cortical network remains displaced by  $\mathbf{v}_i$  away from the optimal preparatory state  $\mathbf{x}^*$  when movement is initiated. **Right:** same  $\nu_i$  and  $\mathcal{E}_{\min}$  as shown on the left, plotted against each other.

214 nequin et al., 2014). Much input energy must be spent to sustain an E/I imbalance in a network  
 215 whose connectivity strives to maintain balance.

#### 216 S4.4 Optimality under neural constraints

217 The linear quadratic regulator presented in Section S4.2 brings the fundamental insight that  
 218 control can (and in fact, should) be achieved via a feedback loop (Figure S2A). Such a loop  
 219 could technically be embedded directly as a modification of the recurrent connectivity within  
 220 M1, as all that matters for the control cost is the effective closed-loop state matrix  $\mathbf{A} + \mathbf{K}$ .  
 221 However, this would make it very difficult to switch the loop ON when movement preparation  
 222 must begin, and OFF again when the movement is triggered. A more flexibly strategy would  
 223 be to have the loop pass through another brain area, and gain-modulate this area (e.g. via  
 224 inhibitory drive) to close or open the loop when appropriate.

225 A natural candidate structure for mediating such cortico-cortical feedback is the motor thalamus,  
 226 which has been shown to be causally involved in movement preparation (Guo et al., 2017).  
 227 Importantly, basic anatomy and physiology pose constraints on the type of connectivity and  
 228 dynamics around the control loop, such that we will have to adapt the classical LQR theory to  
 229 derive plausible circuit mechanisms. In particular, the thalamus is not innervated by the local  
 230 inhibitory interneurons of M1, so feedback will have to be computed based on the activity of (some  
 231 of) the excitatory cells only, precluding full-state feedback. Moreover, the optimal LQR gain  
 232 matrix  $\mathbf{K}$  (given by Equations S19 and S20) contains both positive and negative elements with  
 233 no structure; this violates Dale’s law, i.e. that neurons can be either excitatory or inhibitory  
 234 but are never of a mixed type. Finally, the classical LQR solution prescribes *instantaneous*  
 235 state feedback, whereas thalamic neurons will have to integrate their inputs on finite timescales,  
 236 thereby introducing some “inertia”, or lag, in the feedback loop. In the rest of this section, we  
 237 flesh out these biological constraints in more detail, and show that all of these limitations can  
 238 be addressed mathematically, to eventually yield optimal control via a realistic thalamocortical  
 239 feedback loop (see Figure S2B-D for a graphical overview).

#### 240 S4.5 Feedback based on excitatory neurons only

241 Here, we incorporate the key biological constraints that feedback from the cortex onto itself via  
 242 the thalamus will have to originate from the excitatory cells only. Thus, instead of  $\delta\mathbf{u}(t) =$

243  $\mathbf{K}\delta\mathbf{x}(t)$ , we look for a feedback matrix of the form (Figure S2B)

$$\mathbf{K} = \mathbf{Z}\mathbf{\Gamma} \quad (\text{S23})$$

244 where  $\mathbf{\Gamma} \triangleq [\mathbf{I}_{N_E} \mathbf{0}_{N_E \times N_I}]$  singles out the activity of the E neurons when computing the control  
 245 input  $\mathbf{K}\delta\mathbf{x}$ , and  $\mathbf{Z}$  is an  $N \times N_E$  matrix of free parameters. To gain generality (which we will  
 246 need later), we also assume that the control input enters the network through a matrix  $\mathbf{B}$ , i.e.  
 247 the closed-loop state matrix (Equation S22) becomes  $\mathbf{A}_{cl} = \mathbf{A} + \mathbf{BZ}\mathbf{\Gamma}$ . We now derive algebraic  
 248 conditions of optimality for  $\mathbf{Z}$ , along with a gradient-based method to find the optimal  $\mathbf{Z}$  that  
 249 fulfills them.

250 First, we use Lemma 1 in Appendix A to rewrite the cost function  $\mathcal{J}$  in Equation S18 as:

$$\mathcal{J}(\mathbf{Z}) = \text{trace}(\mathbf{P}) \quad (\text{S24})$$

251 where  $\mathbf{P}$  satisfies

$$0 = \mathbf{G}(\mathbf{P}, \mathbf{Z}) \triangleq \mathbf{A}_{cl}^T \mathbf{P} + \mathbf{P} \mathbf{A}_{cl} + \mathbf{Q} + \lambda \mathbf{\Gamma}^T \mathbf{Z}^T \mathbf{Z} \mathbf{\Gamma}. \quad (\text{S25})$$

252 Note that  $\mathcal{J}$  in Equation S24 is now a function of the feedback matrix  $\mathbf{K}$ , and therefore of the  
 253 parameter matrix  $\mathbf{Z}$ . To minimize  $\mathcal{J}$  w.r.t.  $\mathbf{Z}$  subject to the constraint in Equation S25, we  
 254 introduce the Lagrangian:

$$\mathcal{L}(\mathbf{P}, \mathbf{Z}, \mathbf{S}) \triangleq \text{trace}(\mathbf{P}) + \text{trace}(\mathbf{G}(\mathbf{P}, \mathbf{Z}) \mathbf{S}) \quad (\text{S26})$$

255 where  $\mathbf{S}$  is a symmetric matrix of Lagrange multipliers (the matrix equality in Equation S25 is  
 256 symmetric, thus effectively providing  $N(N+1)/2$  constraints). After some matrix calculus, we  
 257 obtain the following coupled optimality conditions:

$$0 = \partial \mathcal{L} / \partial \mathbf{P} = \mathbf{A}_{cl} \mathbf{S} + \mathbf{S} \mathbf{A}_{cl}^T + \mathbf{I} \quad (\text{S27})$$

$$0 = \partial \mathcal{L} / \partial \mathbf{S} = \mathbf{G}(\mathbf{P}, \mathbf{Z}) \quad (\text{S28})$$

$$0 = \partial \mathcal{L} / \partial \mathbf{Z} = 2\mathbf{B}^T (\mathbf{P} + \lambda \mathbf{BZ}\mathbf{\Gamma}) \mathbf{S} \mathbf{\Gamma}^T. \quad (\text{S29})$$

258 When the two Lyapunov equations Equations S27 and S28 are satisfied, the second term  
 259 ( $\text{trace}(\mathbf{G}\mathbf{S})$ ) in  $\mathcal{L}$  vanishes, such that  $\partial \mathcal{L} / \partial \mathbf{Z}$  of Equation S29 is in fact the gradient of  $\text{trace}(\mathbf{P})$   
 260 w.r.t.  $\mathbf{Z}$  subject to the algebraic constraint of Equation S25. We use this gradient equation,  
 261 together with the L-BFGS optimizer (Byrd et al., 1995) to find the optimal parameter matrix  
 262  $\mathbf{Z}$ . We then recover the optimal feedback gain matrix  $\mathbf{K}$  according to Equation S23. We start  
 263 each optimization by setting  $\mathbf{Z} = \overline{\mathbf{K}} \mathbf{\Gamma}^T (\mathbf{\Gamma} \mathbf{\Gamma}^T)^{-1}$ , where  $\overline{\mathbf{K}}$  is the classical LQR solution to the  
 264 same problem, such that  $\mathbf{Z}\mathbf{\Gamma} = \overline{\mathbf{K}}$ .

## 265 S4.6 Dale's law

266 The previous subsection showed how to obtain a gain matrix  $\mathbf{K}$  of size  $N \times N_E$  that implements  
 267 optimal, instantaneous cortico-cortical feedback originating from the excitatory cells. However,  
 268 this optimal matrix typically has a mix of positive and negative elements that are not specifi-  
 269 cally structured. To implement the more realistic feedback architecture shown in Figure S2C,  
 270 implicating the motor thalamus and M1 layer 4 (M1-L4), we seek a decomposition of the form

$$\mathbf{K} \approx \underbrace{\mathbf{K}_{xz}}_{(+|-)} \underbrace{\mathbf{K}_{zy}}_{(+)} \underbrace{\mathbf{K}_{yx}}_{(+)} \quad (\text{S30})$$

271 where  $\mathbf{K}_{yx}$  (M1 to thalamus) is an  $N_E \times N$  matrix of non-negative elements,  $\mathbf{K}_{zy}$  (thalamus  
 272 to M1-L4) is an  $M \times N_E$  matrix of non-negative elements, and  $\mathbf{K}_{xz}$  (M1-L4 to the recurrent  
 273 M1 network) is an  $N \times M$  matrix composed of  $M_E$  non-negative columns and  $M_I$  non-positive

274 columns (thus  $M = M_E + M_I$ ). Such a sign-structured decomposition will allow optimal control  
 275 to be performed through the more realistic feedback architecture shown in [Figure S2C](#), with  
 276 corresponding dynamics of the form:

$$\begin{aligned}
 \text{M1} \quad & \tau \frac{d\mathbf{x}}{dt} = -\mathbf{x}(t) + \mathbf{W}\phi[\mathbf{x}(t)] + \bar{\mathbf{h}} + \mathbf{h}(t) + \tilde{\mathbf{u}}^* + \mathbf{K}_{xz}\phi[\mathbf{z}(t)] & (\text{S31}) \\
 \text{M1-layer 4} \quad & \mathbf{z}(t) = \mathbf{K}_{zy}\phi[\mathbf{y}(t)] \\
 \text{Thal.} \quad & \mathbf{y}(t) = \mathbf{K}_{yx}\phi[\mathbf{x}(t)]
 \end{aligned}$$

277 where

$$\tilde{\mathbf{u}}^* = \mathbf{x}^* - (\mathbf{W} + \mathbf{K})\phi(\mathbf{x}^*) - \bar{\mathbf{h}} \quad (\text{S32})$$

278 is a condition-dependent steady input given to the network during movement preparation so as  
 279 to achieve the desired fixed point  $\mathbf{x}^*$ .

280 To achieve this decomposition, we note that without loss of generality we can choose  $\mathbf{K}_{yx} =$   
 281  $[\mathbf{R} \mathbf{0}_{N_E \times N_I}]$  – where  $\mathbf{R}$  is a random, element-wise positive  $N_E \times N_E$  matrix – and apply the  
 282 algorithm developed in [Section S4.5](#) now with  $\mathbf{\Gamma} = \mathbf{K}_{yx}$ . This will return an optimal  $N \times N_E$   
 283 matrix  $\mathbf{Z}$  describing feedback from thalamus back to M1, which – as long as  $\mathbf{R}$  is invertible –  
 284 will achieve the same minimum cost as if  $\mathbf{R}$  had been set to  $\mathbf{I}_{N_E}$  (as in [Section S4.5](#)). Here, we  
 285 simply draw each element of  $\mathbf{R}$  from  $\text{Bernoulli}(p)$ , i.e. random sparse projections (the magnitude  
 286 of  $\mathbf{R}$  does not matter at this stage, as only the product  $\mathbf{Z}\mathbf{\Gamma}$  does;  $\mathbf{R}$  will be renormalized later  
 287 below). We now need to decompose this optimal feedback matrix as  $\mathbf{Z} = \mathbf{K}_{xz}\mathbf{K}_{zy}$ , with the  
 288 same sign constraints as in [Equation S30](#). We approach this via optimization, by minimizing  
 289 the squared error implied by the decomposition, plus an 2-norm regularizer:

$$\frac{\|\mathbf{Z} - \mathbf{K}_{xz}\mathbf{K}_{zy}\|_{\text{F}}^2}{\|\mathbf{Z}\|_{\text{F}}^2} + \gamma (\|\mathbf{K}_{xz}\|_{\text{F}}^2 + \|\mathbf{K}_{zy}\|_{\text{F}}^2) \quad (\text{S33})$$

290 We parameterize each element of  $\mathbf{K}_{xz}$  and  $\mathbf{K}_{zy}$  as  $\pm z^2$ , where  $z$  is a free parameter to be  
 291 optimized, and the  $\pm$  sign enforces the sign structure written in [Equation S30](#). Minimization  
 292 is achieved using BFGS and typically converges in a few tens of iterations. We note that the  
 293 product  $\mathbf{K}_{xz}\mathbf{K}_{zy}\mathbf{K}_{yx}$  is invariant to any set of rescalings of the individual matrices as long as  
 294 they cancel out to 1. Thus, after optimization, we re-balance the three matrices such that they  
 295 have identical Frobenius norms. This is mathematically optional, but ensures that firing rates  
 296 in M1, thalamus and M1-L4 have approximately the same dynamic range.

297 Importantly, we find that as long as the number of M1-L4 neurons ( $M$ ) is chosen sufficiently  
 298 large, the decomposition of  $\mathbf{Z}$  that we obtain is almost exact, which implies that the dynamics  
 299 of [Equation S31](#) still achieves optimal anticipatory control of movement under the architectural  
 300 constraint of [Equation S23](#).

## 301 S4.7 Taking into account integration dynamics in thalamus and M1-layer 4

The optimal control solution that we arrived at in [Equation S31](#) still relies on instantaneous  
 feedback from cortex back onto itself. However, neurons in the thalamus and in M1's input  
 layer have their own integration dynamics – this will introduce lag around the loop, which  
 must be taken into account when designing the optimal feedback. We therefore include these  
 dynamics:

$$\begin{aligned}
 \text{M1} \quad & \tau \frac{d\mathbf{x}}{dt} = -\mathbf{x}(t) + \mathbf{W}\phi[\mathbf{x}(t)] + \bar{\mathbf{h}} + h(t) + \tilde{\mathbf{u}}^* + \mathbf{K}_{xz}\phi[\mathbf{z}(t)] & (\text{S34}) \\
 \text{M1-layer 4} \quad & \tau_z \frac{d\mathbf{z}}{dt} = -\mathbf{z} + \mathbf{K}_{zy}\phi[\mathbf{y}(t)] \\
 \text{Thal.} \quad & \tau_y \frac{d\mathbf{y}}{dt} = -\mathbf{y} + \mathbf{K}_{yx}\phi[\mathbf{x}(t)]
 \end{aligned}$$

where the steady input  $\tilde{\mathbf{u}}^*$  is again given by [Equation S32](#), and  $\{\tau_y, \tau_z\}$  are the single-neuron time constants in the thalamus and the cortical input layer. We then seek the optimal connectivity matrices  $\{\mathbf{K}_{xz}, \mathbf{K}_{zy}, \mathbf{K}_{yx}\}$  to fulfill the same optimal-control principles as before, namely the minimization of the cost functional in [Equation S18](#). In order to do that, we note that the dynamics of  $\mathbf{x}$  (M1 activity) in the linear regime do not change if the system of differential equations in [Equation S34](#) is simplified as

$$\begin{aligned}
\text{M1} \quad & \tau \frac{d\mathbf{x}}{dt} = (\mathbf{W} - \mathbf{I})\mathbf{x}(t) + \bar{\mathbf{h}} + h(t) + \tilde{\mathbf{u}}^* + \mathbf{K}\mathbf{z}(t) \\
\text{M1-layer 4} \quad & \tau_z \frac{d\mathbf{z}}{dt} = -\mathbf{z} + \mathbf{y}(t) \\
\text{Thal.} \quad & \tau_y \frac{d\mathbf{y}}{dt} = -\mathbf{y} + \mathbf{x}(t)
\end{aligned} \tag{S35}$$

where  $\mathbf{K} = \mathbf{K}_{xz}\mathbf{K}_{zy}\mathbf{K}_{yx}$  summarizes the three connectivity matrices around the loop into one effective feedback gain matrix. This formulation allows us to combine the steps developed in [Sections S4.5](#) and [S4.6](#) to find the optimal connectivity matrices.

Specifically, we apply the algorithm of [Section S4.5](#) to an augmented system with state matrix

$$\mathbf{A}' \triangleq \begin{bmatrix} \mathbf{A} & \mathbf{0}_{N \times N_E} & \mathbf{0}_{N \times N_E} \\ (\tau/\tau_y)[\mathbf{R} \ \mathbf{0}] & -(\tau/\tau_y)\mathbf{I}_{N_E} & \mathbf{0}_{N_E} \\ \mathbf{0} & (\tau/\tau_z)\mathbf{I}_{N_E} & -(\tau/\tau_z)\mathbf{I}_{N_E} \end{bmatrix}, \tag{S36}$$

input matrix

$$\mathbf{B}' \triangleq \begin{bmatrix} \mathbf{I}_N \\ \mathbf{0}_{N_E \times N} \\ \mathbf{0}_{N_E \times N} \end{bmatrix}, \tag{S37}$$

quadratic cost weighting matrix

$$\mathbf{Q}' \triangleq \begin{bmatrix} \mathbf{Q} & \mathbf{0}_{N \times N_E} & \mathbf{0}_{N \times N_E} \\ \mathbf{0}_{N_E \times N} & \mathbf{0}_{N_E \times N_E} & \mathbf{0}_{N_E \times N_E} \\ \mathbf{0}_{N_E \times N} & \mathbf{0}_{N_E \times N_E} & \mathbf{0}_{N_E \times N_E} \end{bmatrix} \tag{S38}$$

and feedback input parameterized as

$$\mathbf{u} = \mathbf{K}\mathbf{x} \quad \text{with} \quad \mathbf{K} = \mathbf{Z}\mathbf{\Gamma} = \mathbf{Z}[\mathbf{0}_{N_E \times N} \quad \mathbf{0}_{N_E \times N_E} \quad \mathbf{I}_{N_E}] \tag{S39}$$

In [Equation S36](#), the matrix  $\mathbf{R}$  is again a random matrix of sparse positive connections from M1 to thalamus (cf. [Section S4.6](#) above). The optimal  $\mathbf{Z}$  ([Section S4.5](#)) corresponds to the product  $\mathbf{K}_{xz}\mathbf{K}_{zy}$ , which we can further decompose under sign constraints to recover the individual connectivity matrices  $\mathbf{K}_{xz}$  and  $\mathbf{K}_{zy}$ .

## S4.8 Disinhibitory action of the basal ganglia

We model the disinhibitory action of the basal ganglia (BG) on thalamic neurons as an ON-OFF switch: to trigger movement, BG become active (BG neurons not explicitly modelled here) and the thalamic neurons are silenced instantly (i.e.  $\mathbf{y}$  is set to  $\mathbf{0}$ ). When this happens, thalamic inputs to M1-L4 vanish and M1-L4 neural activity decays to zero on a time-scale  $\tau_z$  (see [Equation S36](#)). As the activity of L4 neurons decays, these neurons continue to exert an influence on M1 activity through the connectivity matrix  $\mathbf{K}_{zx}$ . This lead to changes in movement-related M1 dynamics, resulting in small movement errors, which we correct post-hoc by ever-so-slightly re-optimizing the desired initial state  $\mathbf{x}^*$  for each movement. From these new desired states, network dynamics evolves—with the additional inputs from M1-L4 neurons after movement onset—to

323 produce accurate hand trajectories. Crucially, unlike what we described in [Section S2.3](#), we do  
 324 not re-optimize the readout matrix  $\mathbf{C}$  here. This is because the observability Gramian  $\mathbf{Q}$  and  
 325 thus the closed-loop controller  $\mathbf{K}$  depend on  $\mathbf{C}$ : changing the readout matrix  $\mathbf{C}$  at this stage  
 326 would cause the  $\mathbf{K}$  we found to no longer be optimal with respect to  $\mathcal{J}$ . However, because the  
 327 closed-loop solution does not depend on the desired fixed points  $\mathbf{x}^*$ , we can re-optimize  $\mathbf{x}^*$  and  
 328 still be guaranteed that the  $\mathbf{K}$  that we found remains optimal.

## 329 S4.9 Modelling the effect of photoinhibition

330 To model photoinhibition in our full circuit (whose dynamics are described by [Equation S31](#)),  
 331 we simply add a constant positive input  $h_{\text{ph}}$  to a subset of cortical inhibitory neurons chosen  
 332 randomly (see parameters in [Table S1](#)), for a duration  $T_{\text{ph}} = 400$  ms. This results in an overall  
 333 decrease in population activity across both excitatory and inhibitory neurons, consistent with  
 334 the well-known paradoxical effects of adding positive inputs to I cells in inhibition-stabilized  
 335 networks ([Tsodyks et al., 1997](#); [Ozeki et al., 2009](#); [Sanzeni et al., 2019](#)).

336 We closely followed the analyses described in [Li et al. \(2016\)](#) to uncover how activity recovers  
 337 along different state-space directions after perturbation. We focused on two reaches, a 0-degree  
 338 (right) reach and a 180-degree (left) reach. We calculated the coding direction (CD) as the  
 339 difference between the average firing rates of left and right reaches in unperturbed trials in  
 340 a 400 ms time window ending at the end of movement preparation (i.e. 400 ms before the  
 341 control inputs  $\mathbf{u}(t)$  are removed). Independent of the CD, we identified the persistent mode  
 342 (PM) as the direction that maximally separates average firing rates between perturbed and  
 343 unperturbed trials in the same time window, averaged across the two reach conditions. We  
 344 found that CD and PM are orthogonal to each other even though if we did not constrain them  
 345 to be. We found a third remaining mode (RM), constrained to be orthogonal to CD and PM,  
 346 which captures most of average firing rate activity variance across the two reaches in perturbed  
 347 and unperturbed trials. The three modes (CD, PM and RM) together capture approximately  
 348 98% of the average firing rate variance during that time window. We projected perturbed and  
 349 unperturbed activity onto these three modes and calculated root-mean-square deviation between  
 350 perturbed and unperturbed projections over 300 independent perturbation experiments.

## 351 S4.10 Variability quenching

352 We modelled firing rate variability by adding a noisy input term  $\xi(t)$  to  $\bar{\mathbf{h}}(t)$  in [Equation S1](#),  
 353 where  $\xi(t)$  is modelled as an independent Orstein-Uhlenbeck process for each neuron, with a  
 354 time constant  $\tau_{\xi} = 20$  ms and standard deviation  $\sigma_{\xi} = 2$  Hz.

355 In [Figure 6](#), we considered the effect of artificially increasing the dimensionality of the linear  
 356 readout on the strength of variability quenching. To increase the dimensionality of the readout  
 357 from 2 to  $2+L$ , we constructed an augmented linear readout  $(\mathbf{C}^T, \tilde{\mathbf{C}}^T)^T$ , where  $\tilde{\mathbf{C}}$  has dimensions  
 358  $L \times N_E$ . The rows of  $\tilde{\mathbf{C}}$  are a set of orthogonal vectors that are also orthogonal to the rows of  
 359  $\mathbf{C}$ . The norm of the row vectors in  $\tilde{\mathbf{C}}$  are chosen to be the mean squared singular values of  $\mathbf{C}$ ,  
 360 such that the corresponding outputs would have roughly the same norms.

361 To understand the mechanisms underlying variability suppression in the model, we examined  
 362 the eigenvalues of the effective connectivity matrix in closed-loop (preparation) and in open  
 363 loop (spontaneous fluctuations). In closed loop, most eigenvalues are more negative than their  
 364 open-loop counterparts ([Figure S4A](#)). Moreover, the eigenvalues that are most shifted to the left  
 365 in closed loop are associated with eigenvectors with high motor potency (compare [Figure S4B](#)  
 366 and C). Our previous analysis of a similar type of model in [Hennequin et al. \(2018\)](#) showed that

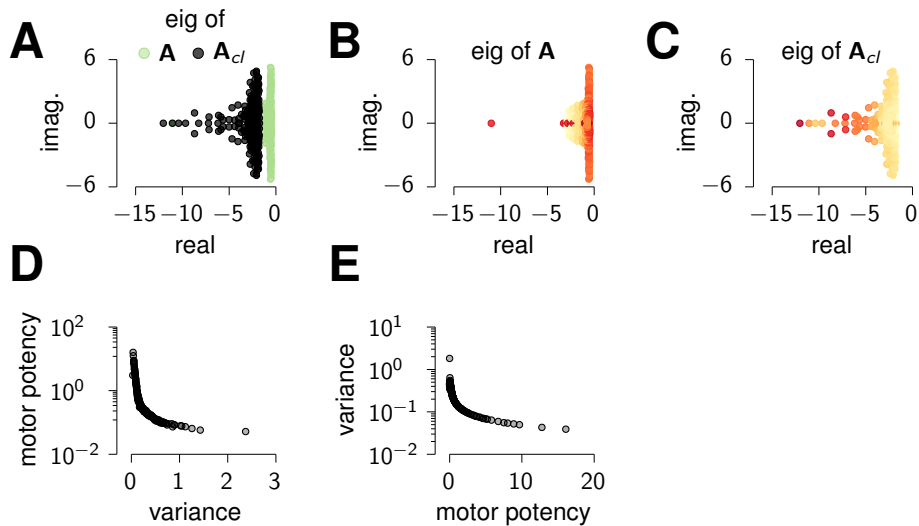

Figure S4: **Mechanisms of variability suppression in the model.** (A) Eigenvalues of  $\mathbf{A} = \mathbf{W} - \mathbf{I}$  (open loop dynamics of the cortical network, green) and  $\mathbf{A}_{cl} = \mathbf{A} + \mathbf{K}$  (LQR closed loop, black). (B and C) Same as in (A), with each eigenvalue colored by the motor potency of the corresponding eigenvector/eigenplanes, using the same color scheme as in Figure 4 of the main text. (D) Motor potency of each principal component of the closed-loop activity covariance in the stochastic model, as a function of the amount of total variance it captures. (E) Total closed-loop activity variance along the eigenmodes of  $\mathbf{Q}$ , plotted as a function of their motor potencies.

367 the more negative an eigenvalue, the less variability in the corresponding eigensubspace. Thus,  
 368 variability quenching should be stronger along directions associated with more negative eigen-  
 369 values, and because of the selective shift of “potent” eigenvalues, our model predicts stronger  
 370 variability suppression in directions of high motor potency. Indeed, we found an inverse relation-  
 371 ship between the motor potency of the principal components of the closed-loop fluctuations, and  
 372 the amount of variance they capture (Figure S4D). Similarly, the amount of variance captured  
 373 by the eigenvectors of  $\mathbf{Q}$  (those used in Figure 4) is inversely related to their motor potency  
 374 (Figure S4E).

## 375 S5 Data analysis and comparison with model

### 376 S5.1 Task and neural recordings

377 We analyzed neural recordings of a monkey J performing a delayed reaching task (data courtesy  
 378 of Mark Churchland, Matt Kaufman and Krishna Shenoy). Both the task and dataset have  
 379 been described in detail previously (Churchland et al., 2010b). Briefly, monkey J performed  
 380 center-out reaches on a fronto-parallel screen. At the beginning of each trial, monkey J fixated  
 381 on the centre of the screen for some time, after which a target appeared on the screen. A variable  
 382 delay period (0–1000 ms) ensued, followed by a go cue instructing the monkey to reach towards  
 383 the target. In this paper, we analyzed only eight movement conditions, corresponding to the  
 384 straight reaches that were most similar to the ones we modelled (Figure S5A). Moreover, we  
 385 restricted our analysis to the trials with delay periods longer than 400 ms, though opening up  
 386 to shorter delays did not substantially affect our results.

387 Recordings were made in the dorsal premotor and primary motor areas. We preprocessed spike  
 388 trains of 123 neurons, following the same procedure outlined in Churchland et al. (2012). Briefly,



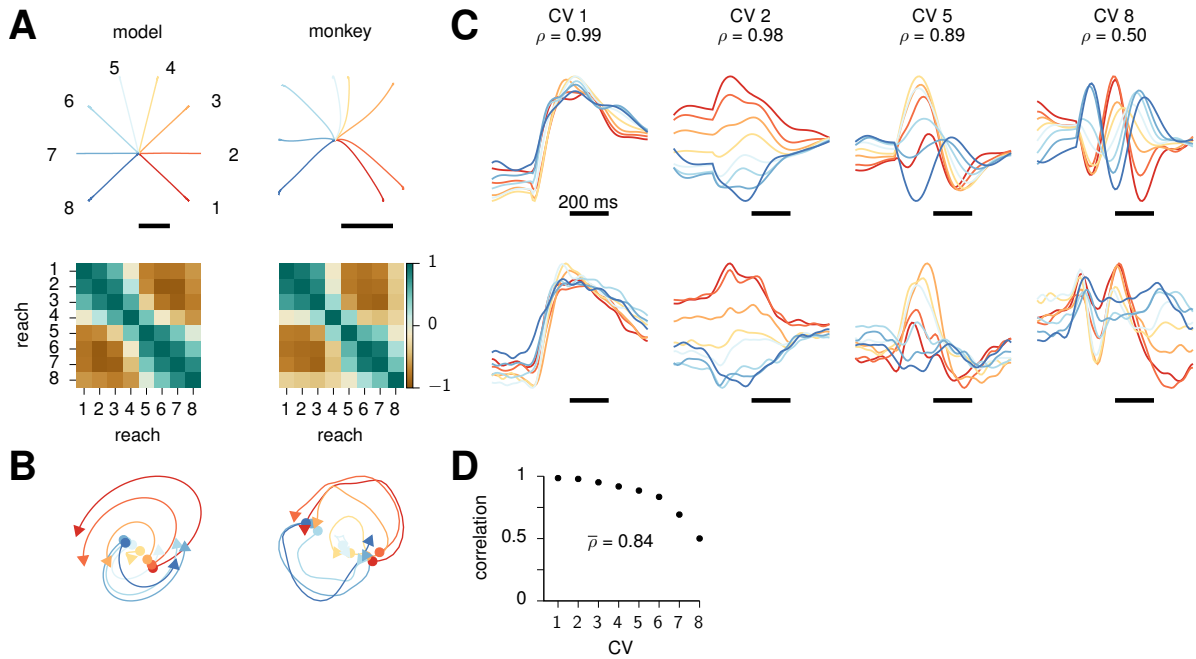

Figure S5: **Model and monkey data comparison.** (A) Top: model (left) and monkey (right) hand trajectories for eight straight reaches (color-coded). Black bars denote 10 cm. Monkey hand trajectories are averaged across trials with delays longer than 400 ms. Bottom: Overlap between the preparatory end-states for model (left) and monkey (right) activity. Reach numbers correspond to those indicated near the model hand trajectories (top left). (B) Neural activity in the model (left) and monkey (right) around movement onset, projected into the top jPC plane (see text). (C) Timecourse of the 1st, 2nd, 5th and 8th canonical variables in the model (top) and monkey (bottom), for each condition (color-coded). Black scale bars indicate 200 ms from movement onset (note that “movement onset” in the model is re-defined to account for the latency between the go cue and actual movement onset in the monkey; see text). (D) Full spectrum of canonical correlations.

389 we computed the average firing rates for each movement condition (8 straight reaches), further  
 390 smoothed using a 20 ms Gaussian filter. Firing rates were computed separately for the delay  
 391 and movement periods, time-locked to target and movement onset respectively; this is necessary  
 392 because of variable delay periods and reaction times.

## 393 S5.2 Overlap between preparatory end-states

394 We calculated the pairwise overlaps (normalized dot-products) between the preparatory end-  
 395 states in both model and monkey data for all reaches. Preparatory end states are defined as  
 396 the activity states reached at the end of movement preparation (monkey activity aligned to go  
 397 cue). In both model and monkey data, preparatory end-states are similar (Figure S5A, bottom)  
 398 for reaches with similar hand trajectories (hand trajectories Figure S5A, top), but negatively  
 399 related for more distant movements.

## 400 S5.3 jPCA

401 We used the method described in Churchland et al. (2012) to identify state-space directions in  
 402 which activity trajectories rotate most strongly. Briefly, we used numerical optimization to fit  
 403 skew-symmetric linear dynamical systems of the form  $\dot{\mathbf{x}} = \mathbf{S}\mathbf{x}$  that best captured model and



404 monkey data, in a 400 ms window starting 200 ms before movement onset for the monkey data,  
 405 and starting at the go cue (i.e. the moment the thalamic neurons are silenced) in the model. We  
 406 projected model and monkey activity trajectories in this window onto a plane spanned by the  
 407 top two eigenvectors of  $\mathbf{S}$  (Figure S5B).

## 408 S5.4 Alignment index

409 To calculate the alignment index, we closely followed the methods described in [Elsayed et al.](#)  
 410 (2016). The alignment index  $\mathcal{A}$  is defined as the percentage of across-condition variance during  
 411 movement captured by the top  $K$  principal components (PCs) of the delay-period activity:

$$\mathcal{A} = \text{Tr} \left( \frac{\mathbf{D}_{\text{prep}}^T \mathbf{C}_{\text{move}} \mathbf{D}_{\text{prep}}}{\sum_{i=1}^K \sigma_{i,\text{prep}}^2} \right). \quad (\text{S40})$$

412 where the  $K$  columns of  $\mathbf{D}_{\text{prep}}$  are the top  $K$  principal components of prep. activity (“prep-  
 413 PCs”),  $\mathbf{C}_{\text{move}}$  is the covariance matrix of move. activity, and  $\sigma_{i,\text{prep}}^2$  is the prep. activity variance  
 414 captured by the  $i^{\text{th}}$  prep-PC. We choose  $K$  such that  $\mathbf{D}_{\text{prep}}$  captures 85% of the variance in  
 415 prep. activity ( $K = 12$  for monkey data and  $K = 4$  for the circuit model). Here, we define  
 416 prep. activity as the delay-period activity during a 300 ms window starting 150 ms after target  
 417 onset; the activity is calculated time-locked to target onset. Similarly, move. activity is defined  
 418 as activity during a 300 ms window starting 100 ms prior to movement onset; the activity is  
 419 calculated using firing rates time-locked to movement onset.

420 Methods for calculating the control of the alignment index are described in detail in the Sup-  
 421plementary Material of [Elsayed et al.](#) (2016) and is not reproduced here. The model alignment  
 422 index is calculated in the same way as that of the neural data. However, there is a mismatch  
 423 between the time of movement onset in the model and that in neural data. In the model, move-  
 424 ment starts immediately after the rapid change in neural activity (i.e., when control inputs are  
 425 removed). In the monkey data, however, movement begins roughly 200 ms after activity starts  
 426 rapidly changing. To roughly align the temporal profile of neural activity in the model and  
 427 data, we defined the time of “movement onset” in the model to be 200 ms after the “go cue”,  
 428 attributing the delay in movement to delays in downstream motor processes not considered in  
 429 this model.

## 430 S5.5 Canonical-correlation analysis

431 To compare model and monkey activity, we performed canonical-correlation analysis (CCA) on  
 432 activity in a time window starting 400 ms before and ending 400 ms after movement onset (see  
 433 alignment index discussion above, for nuance in defining the time of movement onset in model  
 434 activity). To avoid overfitting to noise in CCA ([Sussillo et al., 2015](#); [Raghu et al., 2017](#)), we  
 435 first reduced the dimensionality of the two data sets, by projecting activity onto the top 13  
 436 (monkey) and 8 (model) principal components; the number of principal components are chosen  
 437 to capture 90% of the across-condition activity variance in the two datasets. We then calculated  
 438 the canonical correlations between the two reduced data sets (see [Press, 2011](#), for a numerically  
 439 stable implementation of CCA). We found that monkey and model activity are similar across  
 440 time and reaching movements, with a high average canonical correlation  $\bar{\rho} = 0.84$  (Figure S5 C  
 441 and D). We obtained similar results when we varied the number of principal components kept  
 442 in the two data sets (which in turn varied the number of canonical variables).

## 443 S5.6 Trial-by-trial variability

444 To quantify trial-by-trial fluctuations in the monkey data, we calculated the total spike count  
 445  $c_{imk}(t)$  for neuron  $i$  in condition  $m$  and trial  $k$  in a 150 ms time window centered at time  $t$ .  
 446 We focused on the 8 straight-reaching conditions shown in Figure S5A and trials with a delay  
 447 period longer than 400 ms. We calculated the normalized spike count residuals

$$\tilde{c}_{imk}(t) = \frac{c_{imk}(t)}{\sqrt{\mu_{im}(t)}} - \sqrt{\mu_{im}(t)}, \quad (\text{S41})$$

448 where  $\mu_{im}(t)$  is the average of  $c_{imk}$  across trials. The Fano factor of neuron  $i$  in condition  $m$   
 449 is the variance of  $\tilde{c}_{imk}(t)$  across trials. In Section S5.6B, we reproduced the results previously  
 450 presented in Churchland et al. (2010a): the population- and condition-averaged Fano factor  
 451 drops at target onset.

452 To dissect how variability is quenched along different state-space directions, we generalized this  
 453 notion of Fano factors and defined the projected spike count variability along some state space  
 454 direction  $\mathbf{d}$  to be

$$\mathcal{V}(\mathbf{d}, t) = \langle (\mathbf{d}^T \tilde{\mathbf{c}}_{\bullet mk}(t))^2 \rangle_{mk}, \quad (\text{S42})$$

455 where  $\tilde{\mathbf{c}}_{\bullet mk} = (\tilde{c}_{1mk}, \tilde{c}_{2mk}, \dots, \tilde{c}_{Nmk})^T$ .

456 Our model predicts that variability should be quenched preferentially in directions that matter  
 457 for movement. To test this prediction in monkey data, we extracted three subspaces from trial-  
 458 averaged data. First, we defined a ‘‘coding subspace’’ (CS) as the subspace spanned by average  
 459 neural activity in movements towards the end of movement preparation. We expect this subspace  
 460 to be a potent movement subspace as it is spanned by directions that could move activity from  
 461 a preparatory state corresponding to one reach into that corresponding to another reach. In  
 462 practice, we considered the trial-averaged firing rates averaged in a 100 ms time window starting  
 463 300 ms after target onset. We removed the mean across condition for each neuron and time and  
 464 constructed a data matrix  $\mathbf{X} \in \mathbb{R}^{123 \times 8}$ , where each column contains the population firing rate  
 465 vector for a different movement condition. We only included trials with a delay period longer  
 466 than 400 ms and smoothed the resulting time-averaged activity with a 30 ms Gaussian kernel.  
 467 We then performed PCA and extracted the top  $K = 4$  principal components, which captured  
 468 95% of the variance across conditions. We used these  $K$  principal components to define the CS.  
 469 The average projected spike count in the CS at time  $t$  is a weighted average of the projected  
 470 spike count variability along the  $K$  principal components  $\mathbf{d}_i$ :

$$\frac{1}{\sum_{i=1}^K \sigma_i^2} \sum_{i=1}^K \sigma_i^2 \mathcal{V}(\mathbf{d}_i, t), \quad (\text{S43})$$

471 where  $\sigma_i^2$  is the across-condition variance captured by component  $i$ . The motivation for this  
 472 weighted sum is the following. Not only are directions that capture more of the across-condition  
 473 variance likely more potent (higher prospective error), they are also more reliably estimated in  
 474 the presence of noise (finite number of trials). Thus, they should be weighed more strongly.

475 The second subspace we considered is the ‘‘late-change subspace’’ (LCS), spanned by population  
 476 activity fluctuations experienced towards the end of movement preparation. Since the monkey  
 477 is able to produce an accurate reach after a delay much shorter than 400 ms (Lara et al., 2018),  
 478 late-changes in preparatory activity are likely inconsequential. To estimate this subspace, we  
 479 again considered the trial-and-time averaged firing rates in a 100 ms time window starting 200 ms  
 480 after target onset. We then calculated the eight within-condition differences between the average  
 481 population rate vector in this time window and that collected at the end of preparation (i.e.  
 482 300 ms after target onset). We further removed the mean across conditions for each neuron

483 and time, and assembled a matrix  $\mathbf{Y} \in \mathbb{R}^{123 \times 8}$  as above for the CS. We orthogonalized this  
484 collection of vectors against the CS, and performed PCA as for the CS, retaining 95% of the  
485 variance across conditions ( $K = 7$ ). The projected spike count variance in the LCS is then  
486 calculated as above for the CS.

487 Finally, we considered a third subspace as an independent estimate of likely potent directions.  
488 This subspace, called the “early-change subspace” (ECS), was defined exactly like the LCS  
489 except that we considered activity changes *early* during preparation. Specifically, we subtracted  
490 activity collected at mid-preparation (100 ms window starting 200 ms after target onset) with  
491 prep. activity in the first 100 ms from target onset. The rest of the procedure is as described  
492 above for the LCS.

| symbol | value | unit | description |
|--------|-------|------|-------------|
|--------|-------|------|-------------|

### PARAMETERS OF THE M1 CIRCUIT MODEL

|                       |          |    |                                                |
|-----------------------|----------|----|------------------------------------------------|
| $N_E$                 | 160      | -  | number of E units                              |
| $N_I$                 | 40       | -  | number of I units                              |
| $\tau$                | 150      | ms | time constant of M1 dynamics                   |
| $\tau_{\text{rise}}$  | 50       | ms | rise time constant of $\mathbf{h}(t)$          |
| $\tau_{\text{decay}}$ | 500      | ms | decay time constant of $\mathbf{h}(t)$         |
| $A$                   | implicit | -  | set so that $\mathbf{h}(t)$ has a maximum of 5 |

### ARM MECHANICS AND HAND TRAJECTORIES

|                               |                     |                    |                                               |
|-------------------------------|---------------------|--------------------|-----------------------------------------------|
| $\ell_1$                      | 30                  | cm                 | length of upper arm link                      |
| $\ell_2$                      | 33                  | cm                 | length of lower arm link                      |
| $M_1$                         | 1.4                 | kg                 | mass of upper arm link                        |
| $M_2$                         | 1.0                 | kg                 | mass of lower arm link                        |
| $D_2$                         | 16                  | cm                 | center of mass of lower link, away from elbow |
| $I_1$                         | 0.025               | kg m <sup>-2</sup> | moment of inertia of upper link               |
| $I_2$                         | 0.045               | kg m <sup>-2</sup> | moment of inertia of lower link               |
| $\theta_1^{\text{init}}$      | 10.                 | deg.               | value of $\theta_1$ at rest                   |
| $\theta_2^{\text{init}}$      | 143.54              | deg.               | value of $\theta_2$ at rest                   |
| $\theta_{\text{reach}}^{(i)}$ | $36 \times (i - 2)$ | deg.               | reach angles ( $i = 1, \dots, 8$ )            |
| $d_{\text{reach}}$            | 20                  | cm                 | reach distance                                |
| $\tau_{\text{reach}}$         | 120                 | ms                 | time constant of reach velocity profile       |

### LQR SOLUTION

|           |     |   |                                                      |
|-----------|-----|---|------------------------------------------------------|
| $\lambda$ | 0.1 | - | input energy penalty in <a href="#">Equation S18</a> |
|-----------|-----|---|------------------------------------------------------|

### THALAMO-CORTICAL CIRCUIT MODEL

|           |      |    |                                                      |
|-----------|------|----|------------------------------------------------------|
| $\lambda$ | 0.01 | -  | input energy penalty in <a href="#">Equation S18</a> |
| $p$       | 0.2  | -  | density of random connections from M1 to thal.       |
| $M_E$     | 100  | -  | number of E units in M1 L4                           |
| $M_I$     | 100  | -  | number of I units in M1 L4                           |
| $\tau_y$  | 10   | ms | neuronal time constant in thalamus                   |
| $\tau_z$  | 10   | ms | neuronal time constant in M1 L4                      |

### PHOTOINHIBITION

|                 |     |    |                                                   |
|-----------------|-----|----|---------------------------------------------------|
| $N_{\text{ph}}$ | 100 | -  | number of M1 I units perturbed (60%)              |
| $h_{\text{ph}}$ | 3   | -  | input to perturbed I units during photoinhibition |
| $T_{\text{ph}}$ | 400 | ms | duration of photoinhibition                       |

Table S1: Generic parameters used throughout all simulations

## 493 A Core lemma

494 **Lemma 1** *The matrix integral*

$$\mathbf{Q} \triangleq \int_0^\infty e^{t\mathbf{A}^T} \mathbf{C}^T \mathbf{C} e^{t\mathbf{A}} dt \quad (\text{S44})$$

495 *satisfies the continuous-time Lyapunov equation*

$$\mathbf{A}^T \mathbf{Q} + \mathbf{Q} \mathbf{A} + \mathbf{C}^T \mathbf{C} = \mathbf{0} \quad (\text{S45})$$

496 *This lemma is central to the theory of linear quadratic control, where cost functions are often of*  
497 *the form of integrated squared functions of the state, output, or input, under linear dynamics (as*  
498 *are the costs used in this paper). It allows one to manipulate these integrals algebraically, and*  
499 *compute them numerically by solving a linear matrix equation (e.g. [Bartels and Stewart, 1972](#)).*

## 500 References

- 501 Bartels, R. H. and Stewart, G. W. (1972). Solution of the matrix equation  $\mathbf{AX}+\mathbf{XB}=\mathbf{C}$ . *Com-*  
502 *munications of the ACM*, 15:820–826.
- 503 Byrd, R. H., Lu, P., Nocedal, J., and Zhu, C. (1995). A limited memory algorithm for bound  
504 constrained optimization. *SIAM Journal on Scientific Computing*, 16:1190–1208.
- 505 Churchland, M. M., Byron, M. Y., Cunningham, J. P., Sugrue, L. P., Cohen, M. R., Corrado,  
506 G. S., Newsome, W. T., Clark, A. M., Hosseini, P., Scott, B. B., et al. (2010a). Stimulus onset  
507 quenches neural variability: a widespread cortical phenomenon. *Nat Neurosci*, 13:369–378.
- 508 Churchland, M. M., Cunningham, J. P., Kaufman, M. T., Foster, J. D., Nuyujukian, P., Ryu,  
509 S. I., and Shenoy, K. V. (2012). Neural population dynamics during reaching. *Nature*,  
510 487(7405):51.
- 511 Churchland, M. M., Cunningham, J. P., Kaufman, M. T., Ryu, S. I., and Shenoy, K. V. (2010b).  
512 Cortical preparatory activity: representation of movement or first cog in a dynamical machine?  
513 *Neuron*, 68:387–400.
- 514 Elsayed, G. F., Lara, A. H., Kaufman, M. T., Churchland, M. M., and Cunningham, J. P.  
515 (2016). Reorganization between preparatory and movement population responses in motor  
516 cortex. *Nat Commun*, 7:13239.
- 517 Guo, Z. V., Inagaki, H. K., Daie, K., Druckmann, S., Gerfen, C. R., and Svoboda, K. (2017).  
518 Maintenance of persistent activity in a frontal thalamocortical loop. *Nature*, 545:181–186.
- 519 Hennequin, G., Ahmadian, Y., Rubin, D. B., Lengyel, M., and Miller, K. D. (2018). The  
520 dynamical regime of sensory cortex: stable dynamics around a single stimulus-tuned attractor  
521 account for patterns of noise variability. *Neuron*, 98:846–860.
- 522 Hennequin, G., Vogels, T. P., and Gerstner, W. (2014). Optimal control of transient dynamics  
523 in balanced networks supports generation of complex movements. *Neuron*, 82:1394–1406.
- 524 Kao, T.-C. and Hennequin, G. (2019). Neuroscience out of control: control-theoretic perspectives  
525 on neural circuit dynamics. *Curr Opin Neurobiol*, 58:122–129.
- 526 Kaufman, M. T., Seely, J. S., Sussillo, D., Ryu, S. I., Shenoy, K. V., and Churchland, M. M.  
527 (2016). The Largest Response Component in the Motor Cortex Reflects Movement Timing  
528 but Not Movement Type. *eNeuro*, 3(4):0085–16.2016.

- 529 Lara, A. H., Elsayed, G. F., Zimnik, A. J., Cunningham, J. P., and Churchland, M. M. (2018).  
530 Conservation of preparatory neural events in monkey motor cortex regardless of how movement  
531 is initiated. *eLife*, 7:e31826.
- 532 Li, N., Daie, K., Svoboda, K., and Druckmann, S. (2016). Robust neuronal dynamics in premotor  
533 cortex during motor planning. *Nature*, 532(7600):459–464.
- 534 Li, W. and Todorov, E. (2004). Iterative linear quadratic regulator design for nonlinear biological  
535 movement systems. *International Conference on Informatics in Control, Automation and*  
536 *Robotics*.
- 537 Ozeki, H., Finn, I. M., Schaffer, E. S., Miller, K. D., and Ferster, D. (2009). Inhibitory stabi-  
538 lization of the cortical network underlies visual surround suppression. *Neuron*, 62(4):578–592.
- 539 Press, W. H. (2011). Canonical correlation clarified by singular value decomposition.
- 540 Raghu, M., Gilmer, J., Yosinski, J., and Sohl-Dickstein, J. (2017). Svcca: singular vector  
541 canonical correlation analysis for deep learning dynamics and interpretability. In *NeurIPS*,  
542 pages 6078–6087.
- 543 Sanzeni, A., Akitake, B., Goldbach, H. C., Leedy, C. E., Brunel, N., and Histed, M. H. (2019).  
544 Inhibition stabilization is a widespread property of cortical networks. *bioRxiv*, page 656710.
- 545 Shenoy, K. V., Sahani, M., and Churchland, M. M. (2013). Cortical control of arm movements:  
546 a dynamical systems perspective. *Ann. Rev. Neurosci.*, 36:337–359.
- 547 Skogestad, S. and Postlethwaite, I. (2007). *Multivariable feedback control: analysis and design*,  
548 volume 2. Wiley New York.
- 549 Sussillo, D., Churchland, M. M., Kaufman, M. T., and Shenoy, K. V. (2015). A neural network  
550 that finds a naturalistic solution for the production of muscle activity. *Nat Neurosci*, 18:1025–  
551 1033.
- 552 Tsodyks, M. V., Skaggs, W. E., Sejnowski, T. J., and McNaughton, B. L. (1997). Paradoxical  
553 effects of external modulation of inhibitory interneurons. *J Neurosci*, 17(11):4382–4388.
